# Supplementary material for: Graph complexity analysis identifies an ETV5 tumor-specific network in human and murine low-grade glioma
Source: PLoS One. 2018 May 22;13(5):e0190001. doi: 10.1371/journal.pone.0190001 (PMC5963759; doi:10.1371/journal.pone.0190001)
Supplement: S2 Table — (XLSX) [file pone.0190001.s005.xlsx]

## Sheet: Sheet1
S2 Table. The gene regulatory network used as a reference network.
Regulator	Target	Mode-score	Likelihood
ZBTB33	ZNF605	0.88957	0.76063
ZBTB33	TSPAN3	0.93298	0.88719
ZBTB33	RCL1	0.80748	0.70929
ZBTB33	DCAF7	0.84202	0.96385
ZBTB33	CDC42EP2	-0.90151	0.90522
ZBTB33	KHDRBS3	0.02438	0.48582
ZBTB33	HSPH1	-0.31778	0.73368
ZBTB33	CBX1	0.98973	0.98089
ZBTB33	SDS	-0.33004	0.6188
ZBTB33	SLC27A5	-0.04777	0.30063
ZBTB33	LSM6	0.95549	0.91923
ZBTB33	TMEM132D	-0.34322	0.8742
ZBTB33	TNFAIP8L1	-0.96234	0.95079
ZBTB33	ADH5	0.24878	0.87761
ZBTB33	SHROOM1	-0.62386	0.91626
ZBTB33	CRH	-0.49706	0.83847
ZBTB33	VCAN	0.92672	0.90339
ZBTB33	SAMD13	0.65255	0.71917
ZBTB33	WBSCR27	-0.22927	0.56751
ZBTB33	FREM1	0.61516	0.60343
ZBTB33	ANKFN1	0.9585	0.94541
ZBTB33	CNST	-0.03474	0.8781
ZBTB33	DNAH5	0.0204	0.33762
ZBTB33	VMA21	0.85886	0.97326
ZBTB33	HIPK1	0.50768	0.77603
ZBTB33	EYA4	-0.00244	0.08639
ZBTB33	FABP3	-0.95899	0.94136
ZBTB33	UNC5B	-0.82694	0.80392
ZBTB33	TMEM218	0.97604	0.97534
ZBTB33	VWCE	0.13345	0.21635
ZBTB33	HNRNPA3	0.96607	0.96618
ZBTB33	FHL1	0.97857	0.94889
ZBTB33	CNKSR2	-0.01226	0.85991
ZBTB33	SHANK2	-0.01008	0.83303
ZBTB33	PDZRN3	0.13068	0.68585
ZBTB33	TSPYL4	-0.00314	0.77173
ZBTB33	KIAA1107	-0.16908	0.85228
ZBTB33	PHF3	0.64295	0.80786
ZBTB33	SNAPIN	0.84788	0.90173
ZBTB33	METTL20	0.17488	0.23748
ZBTB33	SLC41A1	0.44221	0.47945
ZBTB33	PLCXD2	-0.00076	0.77049
ZBTB33	SENP6	0.14041	0.64145
ZBTB33	ARL5A	0.60735	0.64604
ZBTB33	TINF2	0.06115	0.24494
ZBTB33	AP3M1	0.13954	0.97997
ZBTB33	SALL3	0.97876	0.98937
ZBTB33	HTATSF1	0.974	0.95096
ZBTB33	APOBEC3C	-0.00874	0.43623
ZBTB33	GPI	-0.76567	0.88577
ZBTB33	SREK1IP1	0.00251	0.82525
ZBTB33	CFAP20	0.83134	0.87275
ZBTB33	HCFC2	0.04077	0.73482
ZBTB33	EFEMP2	-0.19125	0.8448
ZBTB33	HADH	0.89988	0.89992
ZBTB33	SKA2	0.98679	0.98549
ZBTB33	KIFC3	-0.76832	0.6743
ZBTB33	MMP11	-0.03663	0.35551
ZBTB33	SULT1A4	0.00266	0.33292
ZBTB33	MT1M	-0.07117	0.81185
ZBTB33	TRIM37	0.00871	0.97681
ZBTB33	OCRL	0.04419	0.41026
ZBTB33	P4HB	0.01668	0.38273
ZBTB33	PAWR	0.0345	0.18023
ZBTB33	C6orf48	0.43257	0.73381
ZBTB33	ATL1	-0.18897	0.93321
ZBTB33	EGFL7	-0.94998	0.95325
ZBTB33	DBR1	0.82248	0.75634
ZBTB33	SS18L2	0.03214	0.37041
ZBTB33	PCSK1	-0.94701	0.9217
ZBTB33	POP5	0.80607	0.89964
ZBTB33	DPH5	0.94019	0.90494
ZBTB33	ATP6V0A1	-0.00193	0.75044
ZBTB33	RBFOX1	-0.25499	0.90999
ZBTB33	TXNL4B	0.00446	0.00377
ZBTB33	PLEKHB2	-0.02602	0.91359
ZBTB33	SCN3B	-0.06022	0.88323
ZBTB33	PRKRIR	0.9555	0.96366
ZBTB33	PRPS1	0.87234	0.87462
ZBTB33	VANGL2	0.98809	0.98784
ZBTB33	SMEK2	0.94735	0.9593
ZBTB33	KIDINS220	0.76379	0.67749
ZBTB33	MIB1	0.80322	0.96635
ZBTB33	KIAA1324	-0.66987	0.82754
ZBTB33	LRRN1	0.9716	0.95787
ZBTB33	EPB41L5	0.96985	0.95921
ZBTB33	ANKRA2	0.79228	0.75775
ZBTB33	PTPRE	-0.00045	0.12139
ZBTB33	REV3L	0.8421	0.90596
ZBTB33	RNASE1	-0.95588	0.93151
ZBTB33	RPL22	0.53189	0.83302
ZBTB33	RPLP1	0.31739	0.39463
ZBTB33	RPS6KA2	-0.96007	0.95299
ZBTB33	SH3GL3	-0.33065	0.96016
ZBTB33	CCDC136	0.0127	0.01988
ZBTB33	ENGASE	0.03508	0.12139
ZBTB33	CENPH	0.91377	0.85695
ZBTB33	MRPS34	0.59843	0.48092
ZBTB33	SRD5A1	-0.61457	0.29185
ZBTB33	STX1A	-0.70603	0.83916
ZBTB33	TSPAN6	0.92493	0.96026
ZBTB33	TRAF1	-0.1177	0.61365
ZBTB33	YWHAB	-0.03389	0.83554
ZBTB33	SCG2	-0.5776	0.83355
ZBTB33	C1orf50	-0.09418	0.28948
ZBTB33	NDNF	0.25465	0.622
ZBTB33	DHX40	0.97683	0.96762
ZBTB33	NARS2	0.96545	0.92229
ZBTB33	TMEM187	0.43652	0.31792
ZBTB33	ARID1A	0.92659	0.94949
ZBTB33	DYSF	-0.97248	0.95703
ZBTB33	AXIN2	0.77858	0.81245
ZBTB33	MAP1LC3A	-0.93409	0.96951
ZBTB33	DGKZ	-0.95422	0.94974
ZBTB33	CASK	0.9911	0.99173
ZBTB33	TNFRSF6B	-0.3977	0.45642
ZBTB33	SYNJ2	-0.91453	0.85734
ZBTB33	NAE1	0.98437	0.97528
ZBTB33	TAF1A	0.95481	0.97361
ZBTB33	YIF1B	-0.68965	0.72914
ZBTB33	STOML1	-0.95386	0.9066
ZBTB33	QKI	0.36901	0.50621
ZBTB33	RBM8A	0.38234	0.98559
MEF2B	FAM229A	0.81437	0.80948
MEF2B	KHDC1L	0.55379	0.69119
MEF2B	SLC17A4	0.92976	0.9976
MEF2B	AKAP9	0.00444	0.10147
MEF2B	INADL	0.01576	0.09182
MEF2B	GDF11	0.52797	0.61374
MEF2B	RCAN2	-0.36078	0.26333
MEF2B	ZMPSTE24	-0.00143	0.20135
MEF2B	CEL	0.95516	0.94885
MEF2B	ARFGEF2	-0.02393	0.18681
MEF2B	ADCY1	-0.39408	0.61743
MEF2B	CETP	0.78393	0.90712
MEF2B	POP4	-0.01351	0.38194
MEF2B	CD3EAP	0.01296	0.0614
MEF2B	TSPAN9	0.12991	0.0816
MEF2B	FASTK	0.03566	0.14208
MEF2B	RAB32	-0.07271	0.33332
MEF2B	LILRB5	0.09605	0.47902
MEF2B	SF3B2	0.63913	0.6034
MEF2B	LILRA3	0.84913	0.87194
MEF2B	CHD2	0.01509	0.41082
MEF2B	LSM6	0.0147	0.0816
MEF2B	WIF1	-0.38334	0.56819
MEF2B	CHRM3	-0.24984	0.49071
MEF2B	MTFR2	0.21526	0.5209
MEF2B	LYPLA2	0.08914	0.11139
MEF2B	CASC4	-0.00171	0.00761
MEF2B	ADCY8	0.01908	0.13105
MEF2B	RHPN1	0.28256	0.53562
MEF2B	C1QTNF2	0.2933	0.42034
MEF2B	SLC22A12	0.20198	0.50151
MEF2B	LEAP2	0.62699	0.27366
MEF2B	FTSJ3	0.57869	0.64909
MEF2B	UBE2J2	0.03104	0.0614
MEF2B	PRR20A	0.8526	0.96582
MEF2B	CCDC78	0.6661	0.82195
MEF2B	IQCK	-0.00181	0.44873
MEF2B	ANKLE1	0.14931	0.10147
MEF2B	ATXN7L2	0.82225	0.80267
MEF2B	VWA5B1	0.97411	0.97508
MEF2B	COL11A2	0.40667	0.75947
MEF2B	H1FOO	0.02819	0.09182
MEF2B	JMY	0.10048	0.48065
MEF2B	CD109	0.91375	0.96682
MEF2B	COX15	0.01871	0.61769
MEF2B	RALYL	-0.13613	0.18985
MEF2B	XAGE-4	0.02009	0.15366
MEF2B	CRKL	0.00448	0.31416
MEF2B	ACTRT2	0.86051	0.88568
MEF2B	TTC36	0.04016	0.34633
MEF2B	C12orf66	-0.03577	0.58895
MEF2B	ADRA1D	0.02729	0.01569
MEF2B	DNAH2	0.28822	0.4779
MEF2B	CCBE1	0.01051	0.07155
MEF2B	C19orf18	0.65022	0.69324
MEF2B	MOB3C	0.08107	0.29036
MEF2B	CNTN4	-0.12893	0.35558
MEF2B	TMEM229B	0.00338	0.01569
MEF2B	DMXL1	-0.00138	0.04676
MEF2B	RNF168	0.0105	0.0816
MEF2B	GIMAP7	-0.00326	0.01988
MEF2B	AGER	0.37005	0.54925
MEF2B	DSG2	0.00265	0.03759
MEF2B	MEGF6	0.15385	0.35671
MEF2B	TTC21A	0.63838	0.51142
MEF2B	MUC20	0.40385	0.69201
MEF2B	PDILT	0.88318	0.89311
MEF2B	EPHB3	0.06389	0.17762
MEF2B	STX2	-0.00073	0.01988
MEF2B	ERCC1	0.24041	0.35487
MEF2B	ALAS2	0.82198	0.85578
MEF2B	VWCE	0.268	0.44959
MEF2B	UNC5CL	0.54225	0.51664
MEF2B	ITGA11	0.04746	0.26665
MEF2B	FKBP2	0.01853	0.05185
MEF2B	RUFY3	0.00273	0.05185
MEF2B	WDFY3	-0.06438	0.1676
MEF2B	EXOSC7	0.37808	0.29521
MEF2B	FMO2	0.14734	0.27366
MEF2B	ATMIN	-0.03642	0.10615
MEF2B	FKBP15	0.00613	0.01157
MEF2B	HARS2	0.22113	0.70647
MEF2B	PRAME	0.008	0.20937
MEF2B	HMCN2	0.90895	0.89209
MEF2B	C22orf31	0.94176	0.9649
MEF2B	ATXN10	-0.01722	0.34331
MEF2B	TMEM186	0.21578	0.23544
MEF2B	ACOT11	0.37095	0.84938
MEF2B	FAM127B	0.06535	0.55235
MEF2B	LRRC32	-0.00338	0.05633
MEF2B	TIPRL	0.00299	0.56764
MEF2B	GMEB2	0.10541	0.09182
MEF2B	FAM50B	-0.21005	0.36179
MEF2B	AKAP8L	0.81618	0.69519
MEF2B	INVS	0.01009	0.00761
MEF2B	FAM184B	0.00678	0.00377
MEF2B	GNMT	0.38623	0.64097
MEF2B	TEKT2	0.75314	0.90121
MEF2B	POLL	0.90224	0.86188
MEF2B	SLCO4A1	0.00445	0.04676
MEF2B	LINC01465	0.02064	0.29613
MEF2B	CES4A	-0.00052	0.84243
MEF2B	INO80E	0.33724	0.34136
MEF2B	RABL3	-0.25996	0.20643
MEF2B	GRK4	0.56188	0.61455
MEF2B	GRB2	-0.26173	0.36213
MEF2B	SLC6A16	0.06368	0.51114
MEF2B	SETD2	0.212	0.21635
MEF2B	SAP30BP	0.53241	0.48712
MEF2B	GZMM	0.09977	0.31361
MEF2B	SLC29A2	0.27327	0.2539
MEF2B	MYLK4	0.00874	0.01569
MEF2B	CTU2	0.68326	0.54082
MEF2B	AQP5	0.644	0.74109
MEF2B	GALNT18	-0.01949	0.05633
MEF2B	KIF7	0.79389	0.78716
MEF2B	ERCC6L2	0.00303	0.1906
MEF2B	CC2D2B	0.94871	0.9859
MEF2B	SAMD5	0.01317	0.01157
MEF2B	CHCHD10	-0.28267	0.37801
MEF2B	DTHD1	0.24824	0.29521
MEF2B	SLC25A53	0.22482	0.51063
MEF2B	CAPRIN1	0.00304	0.27728
MEF2B	MAOB	-0.04204	0.6269
MEF2B	MBNL1	-0.04453	0.12602
MEF2B	MDM2	0.01461	0.12139
MEF2B	MDM4	0.01264	0.17762
MEF2B	MAP3K3	0.1518	0.61285
MEF2B	MET	-0.02292	0.14936
MEF2B	MMP15	0.7743	0.65207
MEF2B	MPP1	-0.1964	0.2443
MEF2B	LOC441268	0.53783	0.66418
MEF2B	SULT1A4	0.09328	0.66202
MEF2B	MUC4	0.34811	0.39883
MEF2B	MYH3	0.42613	0.66962
MEF2B	MYH11	0.24806	0.69173
MEF2B	NASP	0.06145	0.0816
MEF2B	DRG1	0.01751	0.45229
MEF2B	NELL1	-0.02218	0.19755
MEF2B	NFKBIB	0.12121	0.42072
MEF2B	NRD1	0.01579	0.22824
MEF2B	NUCB1	0.00303	0.03759
MEF2B	ATP4A	0.80587	0.96772
MEF2B	P2RY11	0.93203	0.94797
MEF2B	PCDH9	-0.0846	0.54125
MEF2B	NOSIP	0.25213	0.457
MEF2B	MRPL4	0.21575	0.35089
MEF2B	UBR5	0.41402	0.6631
MEF2B	PDE4B	-0.03071	0.18681
MEF2B	SFMBT1	0.23011	0.19697
MEF2B	HACD3	-0.01266	0.49855
MEF2B	PCF11	0.06418	0.15869
MEF2B	GINS2	0.00896	0.05185
MEF2B	MPP6	0.00283	0.09182
MEF2B	TRAPPC2L	-0.01527	0.0662
MEF2B	GPRC5B	-0.04518	0.2445
MEF2B	GALNT7	-0.30051	0.28389
MEF2B	ACP1	-0.06346	0.24676
MEF2B	ATP6V1B2	-0.72421	0.58234
MEF2B	PMCH	0.80137	0.85356
MEF2B	SETD4	0.01557	0.47879
MEF2B	POLE	0.14738	0.15917
MEF2B	MRPS21	0.10653	0.12139
MEF2B	WDR74	0.41697	0.34544
MEF2B	MED1	0.55239	0.38249
MEF2B	TRMT61B	0.03487	0.17942
MEF2B	MRPS10	-0.03936	0.26694
MEF2B	ADI1	0.00689	0.14417
MEF2B	CCDC91	-0.08889	0.52788
MEF2B	BRIX1	0.01978	0.13716
MEF2B	TMEM127	-0.01016	0.07634
MEF2B	BTBD7	0.01614	0.17131
MEF2B	ALLC	0.85859	0.86117
MEF2B	GSDMB	0.73808	0.66959
MEF2B	PRSS1	0.08642	0.84267
MEF2B	PSMB7	0.00878	0.03325
MEF2B	APMAP	-0.00087	0.05633
MEF2B	PTGIR	0.98318	0.99436
MEF2B	TMEM27	0.47667	0.56577
MEF2B	STRIP2	-0.00079	0.0816
MEF2B	ESYT2	-0.025	0.26439
MEF2B	DOCK6	0.01646	0.17946
MEF2B	USP36	0.53435	0.3967
MEF2B	PTN	-0.03337	0.18681
MEF2B	POGK	0.00339	0.01569
MEF2B	HCN3	0.87828	0.84833
MEF2B	GPR107	0.18369	0.21635
MEF2B	PTPN7	0.20468	0.60618
MEF2B	SLAMF7	0.03352	0.53376
MEF2B	RHEB	0.00256	0.45336
MEF2B	HPSE2	0.6058	0.87261
MEF2B	SPCS3	-0.0146	0.38099
MEF2B	BCR	0.04019	0.36663
MEF2B	RPL32	0.1493	0.17762
MEF2B	SCNN1D	0.67129	0.72394
MEF2B	SDHD	-0.00144	0.13661
MEF2B	SRSF1	0.02047	0.03325
MEF2B	TMEM168	-0.01766	0.20645
MEF2B	ATG3	-0.1009	0.20027
MEF2B	ANAPC1	0.04901	0.09182
MEF2B	NUCKS1	0.00507	0.28973
MEF2B	FAM160B2	0.70716	0.72237
MEF2B	ETNPPL	-0.00148	0.19007
MEF2B	FAM129B	0.17068	0.4897
MEF2B	SLC26A6	0.4584	0.51283
MEF2B	TMEM135	0.00462	0.0614
MEF2B	BMP4	0.89787	0.8864
MEF2B	BNIP1	0.23623	0.2972
MEF2B	SPG7	0.06062	0.70519
MEF2B	SPINK1	0.39709	0.21635
MEF2B	SPTA1	0.45989	0.41325
MEF2B	SRM	0.08506	0.07155
MEF2B	HSPA13	-0.02074	0.08639
MEF2B	AURKC	0.09179	0.0614
MEF2B	SUV39H1	0.53608	0.34136
MEF2B	CNTN2	-0.4506	0.28389
MEF2B	TDGF1	0.50758	0.65573
MEF2B	TESK1	-0.00069	0.18108
MEF2B	TIE1	0.09194	0.40595
MEF2B	SEC62	-0.00691	0.44636
MEF2B	ZBTB8B	0.47263	0.50759
MEF2B	LOC729088	0.38786	0.43364
MEF2B	RGPD6	0.07767	0.60737
MEF2B	LOC729887	0.79285	0.69824
MEF2B	XRCC3	0.74755	0.78379
MEF2B	YWHAB	-0.107	0.83117
MEF2B	YWHAH	-0.84242	0.81636
MEF2B	DAP3	0.00709	0.01569
MEF2B	CACNG1	0.44273	0.61296
MEF2B	MAPKAPK3	0.00388	0.01569
MEF2B	GID4	0.00732	0.74663
MEF2B	CPSF7	0.51043	0.36315
MEF2B	ACTR5	0.6144	0.55538
MEF2B	CNTD2	0.9127	0.95806
MEF2B	SLC8B1	0.00637	0.00377
MEF2B	INTS5	0.58517	0.3908
MEF2B	DUSP16	0.00557	0.05633
MEF2B	GPR63	0.18839	0.59325
MEF2B	RND2	0.52394	0.65093
MEF2B	LRRC3	0.24436	0.87097
MEF2B	HYI	0.11708	0.5338
MEF2B	EPPK1	0.12158	0.30762
MEF2B	SELO	0.21698	0.31952
MEF2B	GRWD1	0.06341	0.03325
MEF2B	STK40	-0.00062	0.26905
MEF2B	EMILIN2	-0.00314	0.25497
MEF2B	EEA1	-0.00057	0.44444
MEF2B	LRRC8C	-0.0058	0.2443
MEF2B	LTBP4	0.31193	0.46156
MEF2B	DNAJC30	-0.05611	0.49958
MEF2B	ARFGAP2	0.31894	0.3908
MEF2B	USP32	-0.49125	0.39954
MEF2B	MFSD2A	0.04552	0.11139
MEF2B	WDR73	0.04049	0.11139
MEF2B	RBM17	0.00576	0.77741
MEF2B	USP45	0.04529	0.05185
MEF2B	IKBKAP	0.08724	0.09182
MEF2B	BAGE4	0.65587	0.71642
MEF2B	EAF1	-0.00043	0.00377
MEF2B	CIPC	-0.00204	0.17166
MEF2B	CDC14B	0.0557	0.1869
MEF2B	CDK10	0.12551	0.14208
MEF2B	KHSRP	0.8323	0.49595
MEF2B	EIF4G3	-0.0011	0.44846
MEF2B	SCEL	0.02765	0.46946
MEF2B	ANKRD13A	0.21215	0.17762
MEF2B	UMODL1	0.35649	0.40847
MEF2B	SEC16B	0.1543	0.75288
MEF2B	KBTBD6	-0.00245	0.15176
MEF2B	TAF1C	0.6108	0.63702
MEF2B	MCFD2	-0.10374	0.51348
MEF2B	ARTN	0.2057	0.26479
MEF2B	PRC1	-0.00063	0.0662
MEF2B	TCEAL8	-0.15156	0.85791
MEF2B	C12orf29	-0.00205	0.17192
MEF2B	MRPS36	-0.00088	0.00761
MEF2B	SPSB4	0.58864	0.77954
MEF2B	CYTH2	0.53198	0.46937
MEF2B	EFTUD2	0.04004	0.0816
MEF2B	SCARB1	0.08384	0.21635
MEF2B	NRG2	0.53454	0.66519
MEF2B	PPM1F	-0.00041	0.01157
MEF2B	ARMCX2	0.00294	0.60378
MEF2B	MED12	0.94404	0.88277
NR1H3	DNM1L	-0.75444	0.73441
NR1H3	TSPAN3	0.00379	0.66851
NR1H3	ABI2	-0.53426	0.73031
NR1H3	STAM2	-0.00396	0.18061
NR1H3	CDK2AP2	0.86311	0.66584
NR1H3	2017-03-06	-0.59119	0.82652
NR1H3	TCIRG1	0.72281	0.85596
NR1H3	ST3GAL6	0.00314	0.13605
NR1H3	EMG1	0.85119	0.57459
NR1H3	APPBP2	-0.0253	0.57876
NR1H3	CIB1	0.94709	0.90437
NR1H3	POLR3F	-0.02692	0.11606
NR1H3	NPRL2	0.64047	0.43954
NR1H3	SPIN1	-0.82248	0.81433
NR1H3	TOMM34	-0.00796	0.64013
NR1H3	LILRB5	0.83971	0.9042
NR1H3	ADAMTS13	0.41396	0.36677
NR1H3	ERLIN2	0.88825	0.85622
NR1H3	NUDT3	-0.73604	0.5624
NR1H3	PSIP1	-0.22931	0.25788
NR1H3	CHKA	0.00472	0.05633
NR1H3	SAT2	0.89413	0.83274
NR1H3	B4GALT7	0.92227	0.94726
NR1H3	PLCD3	0.05974	0.32499
NR1H3	VSIG4	0.60448	0.71417
NR1H3	EXOC3	0.57117	0.74758
NR1H3	PTPMT1	0.49543	0.85636
NR1H3	VASN	0.04782	0.83352
NR1H3	CCDC151	0.89723	0.78574
NR1H3	MRPL53	0.8928	0.83699
NR1H3	ACAP3	-0.06659	0.26417
NR1H3	SSX2IP	-0.86778	0.89634
NR1H3	TMEM219	0.881	0.84199
NR1H3	SLC38A10	0.91603	0.91502
NR1H3	GALM	0.78684	0.68481
NR1H3	TPRA1	0.91819	0.78178
NR1H3	LSM11	-0.72735	0.79787
NR1H3	PTRH1	0.10706	0.32627
NR1H3	RPP25L	0.18526	0.34959
NR1H3	AAMP	0.62	0.68691
NR1H3	RNF32	-0.00047	0.00377
NR1H3	MDP1	0.10209	0.65624
NR1H3	ADRA1D	-0.00686	0.12602
NR1H3	B3GNTL1	0.40222	0.57848
NR1H3	SLC47A2	0.63047	0.45943
NR1H3	CSTB	0.80622	0.74776
NR1H3	PDIK1L	-0.55398	0.68345
NR1H3	CDPF1	0.83476	0.76258
NR1H3	GLIPR2	0.00619	0.88955
NR1H3	ADRBK1	-0.26137	0.47889
NR1H3	DENND5B	-0.00159	0.45931
NR1H3	DGKB	-0.5652	0.8824
NR1H3	AP1B1	0.52145	0.2539
NR1H3	FAM134C	0.83633	0.55166
NR1H3	DHX9	-0.35276	0.26333
NR1H3	DEFA1	0.0167	0.01569
NR1H3	COMMD6	0.56933	0.59809
NR1H3	DUSP3	-0.17481	0.22549
NR1H3	DYRK1A	-0.02861	0.61431
NR1H3	EIF2D	0.92469	0.92068
NR1H3	KRTCAP2	0.42687	0.57787
NR1H3	KLHDC8B	0.21433	0.36942
NR1H3	EPOR	0.71761	0.71153
NR1H3	EXTL2	-0.92597	0.85348
NR1H3	FABP2	-0.00318	0.0662
NR1H3	FAU	0.92835	0.85296
NR1H3	CYB561A3	0.81131	0.69479
NR1H3	ALDH3B1	0.81841	0.71206
NR1H3	ALKBH3	0.7532	0.70702
NR1H3	FCGR2B	0.61471	0.87458
NR1H3	FCGRT	0.81268	0.88576
NR1H3	FDXR	0.79865	0.70506
NR1H3	FGF11	0.78055	0.89437
NR1H3	FGR	0.86755	0.82779
NR1H3	RRAS2	0.83743	0.90821
NR1H3	COBLL1	-0.04169	0.10615
NR1H3	BTBD3	-0.72077	0.77991
NR1H3	SHANK2	-0.13619	0.67301
NR1H3	WDFY3	-0.73053	0.44556
NR1H3	RTF1	-0.19385	0.22549
NR1H3	PSD3	-0.84709	0.70971
NR1H3	RRP8	0.94342	0.83288
NR1H3	MACF1	-0.022	0.48597
NR1H3	RBFOX2	-0.93375	0.84391
NR1H3	LILRA4	-0.01056	0.15366
NR1H3	PLXNB2	0.79783	0.82225
NR1H3	PLA2G15	0.7925	0.78828
NR1H3	SPESP1	0.02164	0.09182
NR1H3	KDSR	0.07987	0.93251
NR1H3	EHBP1L1	0.44923	0.63031
NR1H3	GAA	0.91849	0.89822
NR1H3	TMEM256	0.93667	0.87747
NR1H3	EML3	0.85296	0.80849
NR1H3	PLCXD2	-0.50287	0.83724
NR1H3	ARIH1	-0.32509	0.27502
NR1H3	PRDX5	0.33452	0.37073
NR1H3	BRMS1	0.90399	0.88472
NR1H3	KANK2	0.05741	0.15869
NR1H3	ANKRD17	-0.90327	0.92077
NR1H3	FBXO10	-0.40981	0.57008
NR1H3	HIBCH	0.38321	0.63222
NR1H3	GBA	0.80312	0.84803
NR1H3	NUPR1	0.94872	0.8836
NR1H3	GGT5	0.55981	0.4924
NR1H3	HSPB7	0.1564	0.10147
NR1H3	CPNE7	-0.00365	0.03759
NR1H3	PGAP2	0.88464	0.87304
NR1H3	GLG1	0.67367	0.60445
NR1H3	GLUD1	-0.11235	0.80036
NR1H3	GNAS	-0.00268	0.76113
NR1H3	GNB1	-0.92517	0.92781
NR1H3	GOT2	-0.91249	0.83921
NR1H3	TMEM80	0.23771	0.11139
NR1H3	MORN3	-0.00081	0.05633
NR1H3	FAM102B	-0.56309	0.77127
NR1H3	SUMF1	0.72133	0.72787
NR1H3	GRN	0.79444	0.86408
NR1H3	SLC27A6	0.20275	0.21635
NR1H3	AAMDC	0.91833	0.87104
NR1H3	CHMP4A	0.58348	0.30287
NR1H3	SCG3	-0.01763	0.71257
NR1H3	GSTP1	0.83543	0.75391
NR1H3	GSTZ1	0.48728	0.67671
NR1H3	LRP12	-0.76169	0.90628
NR1H3	UBE2K	-0.74097	0.77752
NR1H3	SP110	0.48733	0.71586
NR1H3	IL16	0.16909	0.10147
NR1H3	JAK2	-0.01828	0.08639
NR1H3	TMEM179B	0.87534	0.8768
NR1H3	BLOC1S3	0.03214	0.10147
NR1H3	PCNXL3	0.39783	0.57029
NR1H3	SERTM1	-0.42297	0.64638
NR1H3	C8orf59	0.38729	0.63217
NR1H3	LSAMP	-0.01516	0.64557
NR1H3	ANKHD1-EIF4EBP3	-0.01012	0.97029
NR1H3	LTBP3	0.83146	0.84765
NR1H3	MANBA	0.91323	0.93085
NR1H3	MARK1	-0.91381	0.95538
NR1H3	MBNL1	-0.0278	0.33427
NR1H3	MGAT1	0.74628	0.87936
NR1H3	TMEM41B	-0.00041	0.45235
NR1H3	TRIM6-TRIM34	-0.0253	0.08639
NR1H3	NAGLU	0.87491	0.8917
NR1H3	NPPA	-0.03346	0.23099
NR1H3	ATP2B1	-0.83934	0.9213
NR1H3	NUCB2	0.57714	0.69751
NR1H3	CYHR1	0.1496	0.63001
NR1H3	HDGFRP3	-0.92297	0.95933
NR1H3	CLEC4A	0.78459	0.48597
NR1H3	DERA	0.81437	0.84628
NR1H3	TMX2	0.67296	0.72393
NR1H3	SCCPDH	0.20259	0.32352
NR1H3	VPS28	0.68291	0.71675
NR1H3	TIMMDC1	0.69541	0.68694
NR1H3	ARL6IP4	0.60451	0.83131
NR1H3	TEX264	0.93617	0.94301
NR1H3	HEMK1	0.95547	0.94477
NR1H3	RNF138	0.025	0.02863
NR1H3	TMEM138	0.95529	0.95383
NR1H3	STYXL1	0.92656	0.8641
NR1H3	PER1	0.09693	0.23823
NR1H3	ATP6V1A	-0.92386	0.6165
NR1H3	PIN4	-0.01019	0.65191
NR1H3	PLD2	0.86952	0.78837
NR1H3	PLTP	0.85263	0.96586
NR1H3	FXYD6	-0.04526	0.5269
NR1H3	ACP5	0.86946	0.91932
NR1H3	CCHCR1	0.27179	0.27366
NR1H3	TOMM7	0.81121	0.5769
NR1H3	NDFIP2	-0.6885	0.80878
NR1H3	AHI1	-0.3828	0.37546
NR1H3	SLC35F6	0.76033	0.5512
NR1H3	C2orf42	0.17655	0.50767
NR1H3	LAMTOR1	0.95044	0.88812
NR1H3	VPS37C	0.89399	0.88089
NR1H3	OXR1	-0.90827	0.81569
NR1H3	TAPBPL	0.91046	0.89903
NR1H3	ADI1	0.78892	0.82259
NR1H3	PPP2R5D	-0.86317	0.77465
NR1H3	RHOT1	-0.25178	0.72056
NR1H3	UFSP2	0.07018	0.12139
NR1H3	RNLS	-0.02381	0.33764
NR1H3	DRAM1	0.89299	0.86453
NR1H3	PPP5C	-0.32573	0.54428
NR1H3	PIDD1	0.87279	0.71091
NR1H3	LRRC40	-0.62677	0.59952
NR1H3	FLVCR2	0.91669	0.95244
NR1H3	CNDP2	0.36295	0.53256
NR1H3	DDX28	0.61632	0.3908
NR1H3	MAP2K5	0.04669	0.07155
NR1H3	FEM1C	-0.02018	0.01157
NR1H3	PSMC1	-0.0068	0.45418
NR1H3	RSRP1	0.03786	0.28079
NR1H3	PSMD1	-0.74554	0.75162
NR1H3	LYRM1	0.34717	0.66948
NR1H3	CORO1B	0.87821	0.89071
NR1H3	TBC1D24	-0.73654	0.6967
NR1H3	NWD2	-0.63581	0.89458
NR1H3	NYNRIN	0.29983	0.17762
NR1H3	STIM2	-0.39413	0.70537
NR1H3	CCDC181	-0.41352	0.20643
NR1H3	INIP	-0.85877	0.86508
NR1H3	DLGAP3	-0.31554	0.85548
NR1H3	RAC2	0.28329	0.53363
NR1H3	RANBP2	0.00557	0.03325
NR1H3	DPF2	0.86711	0.80902
NR1H3	FAM3A	0.88724	0.88352
NR1H3	PPCDC	0.70011	0.77235
NR1H3	RNH1	0.94901	0.90407
NR1H3	ELAC2	0.61353	0.50267
NR1H3	RPL23A	-0.00054	0.01988
NR1H3	RPL36AL	0.60035	0.57329
NR1H3	RPL37A	-0.49014	0.50958
NR1H3	S100A10	0.44345	0.42159
NR1H3	SCNN1G	0.00579	0.03759
NR1H3	CCL18	0.83204	0.84528
NR1H3	THADA	0.84573	0.75134
NR1H3	XYLT2	0.93284	0.86718
NR1H3	PDLIM2	0.91952	0.80337
NR1H3	HS1BP3	0.95151	0.95892
NR1H3	SIL1	0.79615	0.88989
NR1H3	DCLRE1C	-0.00105	0.65732
NR1H3	SGSH	0.59123	0.60075
NR1H3	TXNRD3NB	0.82298	0.68806
NR1H3	PCED1A	0.84122	0.92085
NR1H3	MTHFSD	0.17373	0.38801
NR1H3	ANKRD33B	-0.50609	0.74471
NR1H3	SLC6A6	-0.00354	0.44551
NR1H3	SLC25A1	0.69574	0.72444
NR1H3	BMPR2	-0.03797	0.6562
NR1H3	FUNDC2	0.76619	0.72182
NR1H3	LYNX1	-0.00158	0.7588
NR1H3	SNAPC3	-0.74307	0.70451
NR1H3	SPR	0.94828	0.89308
NR1H3	SURF1	0.89893	0.91414
NR1H3	SYT1	-0.55544	0.81173
NR1H3	TAZ	0.89791	0.87814
NR1H3	TLE1	-0.00618	0.19039
NR1H3	TSPAN4	0.85817	0.76434
NR1H3	GPR137B	0.60516	0.852
NR1H3	TNS1	0.85623	0.76526
NR1H3	TPM2	0.28349	0.29521
NR1H3	TPR	-0.11827	0.6517
NR1H3	D2HGDH	0.78901	0.79989
NR1H3	SLC35E2B	-0.09498	0.44296
NR1H3	NPIPB11	-0.46576	0.51237
NR1H3	UBE2N	-0.92427	0.93113
NR1H3	USP1	-0.39229	0.84979
NR1H3	VEGFB	0.53847	0.68763
NR1H3	SF1	-0.02589	0.21635
NR1H3	SCNM1	0.55532	0.72704
NR1H3	TRAPPC6A	0.81885	0.63022
NR1H3	GDPD3	0.74113	0.46937
NR1H3	HSD17B8	0.7433	0.60485
NR1H3	OCEL1	0.482	0.48006
NR1H3	AKIRIN1	-0.63789	0.64295
NR1H3	NLRX1	0.97616	0.97458
NR1H3	ZYG11B	-0.93692	0.88034
NR1H3	MICALL2	0.1328	0.41276
NR1H3	SUGCT	0.87832	0.70348
NR1H3	RIN3	0.926	0.92327
NR1H3	ATHL1	0.64255	0.56984
NR1H3	TMEM134	0.93885	0.8584
NR1H3	PTP4A2	-0.00071	0.14962
NR1H3	URM1	0.20953	0.21153
NR1H3	AXIN2	-0.0148	0.75015
NR1H3	C19orf12	-0.80284	0.68126
NR1H3	HIST1H4C	-0.06361	0.28659
NR1H3	ROPN1L	0.00263	0.01569
NR1H3	TMEM120A	0.86301	0.58281
NR1H3	IFI27L2	0.92757	0.90977
NR1H3	NCALD	-0.82919	0.76992
NR1H3	FAM160A2	0.62557	0.60905
NR1H3	FAM161A	-0.12707	0.39552
NR1H3	C19orf44	0.20905	0.15869
NR1H3	LDOC1L	-0.00736	0.60787
NR1H3	NTPCR	0.30738	0.60389
NR1H3	NUDT22	0.60531	0.65963
NR1H3	EFCAB7	-0.23528	0.52534
NR1H3	C14orf142	0.00329	0.00761
NR1H3	ABHD14B	0.96263	0.96268
NR1H3	PHYKPL	0.76749	0.64192
NR1H3	TSLP	0.28455	0.65739
NR1H3	PDXK	-0.00043	0.37146
NR1H3	EIF4G3	-0.91147	0.85804
NR1H3	MARCO	0.61017	0.89011
NR1H3	SYS1	0.84172	0.81686
NR1H3	BRSK2	-0.53496	0.87442
NR1H3	EFCAB12	0.00479	0.03759
NR1H3	CD1D	0.52703	0.27366
NR1H3	RPS19BP1	0.30518	0.42289
NR1H3	TTC30A	0.31679	0.39463
NR1H3	UBTD2	-0.00305	0.7092
NR1H3	RBM18	-0.48475	0.32912
NR1H3	STK17B	0.34472	0.69013
NR1H3	ORAI3	0.9669	0.95712
NR1H3	SNAP29	0.02017	0.00377
NR1H3	SYTL4	0.72636	0.69845
NR1H3	QKI	-0.04736	0.76091
NR1H3	GSTO1	0.03911	0.50259
NR1H3	ACY1	0.96912	0.96187
NR1H3	RPH3AL	0.42787	0.62535
NR1H3	ADAMTS2	0.0883	0.09182
NR1H3	CD81	0.69855	0.78442
NR1H3	MLEC	-0.00129	0.82532
NR1H3	FAM20B	-0.93816	0.91061
NR1H3	CCS	0.97431	0.91112
NR1H3	DOPEY2	-0.01587	0.50343
PREB	A1BG	0.35648	0.21635
PREB	GNPDA1	0.84371	0.70312
PREB	OST4	0.94792	0.97158
PREB	PET100	0.7134	0.68758
PREB	PLA2G4B	-0.0304	0.84363
PREB	SAP25	0.0069	0.03325
PREB	ABCF2	0.91282	0.94538
PREB	DPP3	0.93798	0.95302
PREB	TSSC4	0.57136	0.56918
PREB	PDIA6	0.95786	0.96082
PREB	ABI2	0.00281	0.88602
PREB	LPCAT3	0.85094	0.87983
PREB	FLOT1	0.59371	0.80697
PREB	CDK2AP2	0.86022	0.85973
PREB	NET1	-0.94827	0.95692
PREB	BCKDK	0.95059	0.91753
PREB	2017-03-06	-0.01473	0.9302
PREB	TRDN	-0.09088	0.14936
PREB	BTN3A3	0.27792	0.50814
PREB	ANAPC10	0.10182	0.52439
PREB	ATP8A1	-0.884	0.89713
PREB	MYL9	0.89161	0.90641
PREB	IFI30	0.87895	0.83059
PREB	TIMM44	0.88782	0.80755
PREB	SPTLC1	0.06423	0.20854
PREB	SIVA1	0.8991	0.83746
PREB	GNLY	0.12221	0.12139
PREB	USP16	-0.12731	0.14936
PREB	TGOLN2	0.13441	0.67587
PREB	POSTN	0.60421	0.70375
PREB	CELF2	-0.12945	0.98634
PREB	FARS2	0.68385	0.77799
PREB	EBP	0.68573	0.54334
PREB	WASF3	-0.96342	0.93939
PREB	SPIN1	-0.85307	0.81602
PREB	AFG3L2	0.45179	0.39603
PREB	LMAN2	0.97581	0.98156
PREB	ERP29	0.86783	0.86177
PREB	UQCR11	0.80668	0.83093
PREB	CLP1	0.75465	0.81383
PREB	ADRM1	0.98301	0.98457
PREB	RAPGEF4	-0.86059	0.95832
PREB	TMEM115	0.94879	0.9613
PREB	RER1	0.95351	0.97708
PREB	EMILIN1	0.95985	0.94825
PREB	KIF3A	-0.91451	0.93246
PREB	AKAP11	-0.9377	0.97673
PREB	EGLN2	0.23624	0.21635
PREB	GLMP	0.933	0.91528
PREB	MGAT4B	0.96849	0.96965
PREB	TP53RK	0.92913	0.92257
PREB	COPE	0.6968	0.64105
PREB	SLITRK1	-0.88915	0.92193
PREB	FAM46B	0.8513	0.72535
PREB	MRPL53	0.8342	0.92155
PREB	WDR17	-0.87279	0.92079
PREB	CFAP70	-0.0132	0.42955
PREB	TRAPPC6B	-0.72534	0.94038
PREB	KLHDC1	-0.96682	0.92513
PREB	C19orf70	0.89163	0.90286
PREB	APOA1BP	0.89104	0.84581
PREB	TBC1D20	0.85603	0.73056
PREB	JMY	-0.95706	0.95385
PREB	C5orf24	-0.03848	0.13111
PREB	COX15	-0.9266	0.96296
PREB	LETM2	-0.04828	0.3614
PREB	AAMP	0.48355	0.24813
PREB	CSE1L	-0.10466	0.57782
PREB	TTC36	-0.00067	0.00377
PREB	C14orf37	-0.26188	0.55731
PREB	MDP1	0.00834	0.3337
PREB	TTBK2	-0.18762	0.96738
PREB	FAM71A	-0.26413	0.38248
PREB	COMMD1	0.33029	0.42573
PREB	CTSD	0.54195	0.44268
PREB	RNF38	-0.08904	0.5783
PREB	CCDC13	-0.91458	0.87395
PREB	IGSF11	-0.23476	0.47561
PREB	ANKRD46	-0.91438	0.9633
PREB	KIAA2026	-0.98552	0.98111
PREB	DENND5B	0.00796	0.88544
PREB	AP2A2	-0.18251	0.49767
PREB	DAPK1	-0.88925	0.7648
PREB	EML5	-0.32514	0.62064
PREB	DDT	0.72566	0.57034
PREB	DNA2	-0.00079	0.04233
PREB	DYNC1LI2	-0.90905	0.88147
PREB	EIF4A2	-0.87641	0.89519
PREB	EIF4G1	0.03212	0.97151
PREB	ELAVL2	-0.8184	0.9313
PREB	TXLNA	0.948	0.96002
PREB	RPL22L1	0.16344	0.44349
PREB	CLN8	-0.61124	0.12602
PREB	EXT2	0.94832	0.9788
PREB	ARMC3	0.00785	0.13687
PREB	FAM171A1	-0.91414	0.78098
PREB	DAGLB	0.12227	0.13105
PREB	NAPEPLD	-0.65777	0.73092
PREB	FH	0.14922	0.51106
PREB	SCAF8	-0.01288	0.08639
PREB	RAB11FIP2	-0.9554	0.92976
PREB	FBXO21	-0.87436	0.86145
PREB	TNIK	-0.00503	0.32912
PREB	HECW1	-0.93617	0.97744
PREB	KIF1B	0.01003	0.92509
PREB	SPG20	-0.22542	0.55155
PREB	CLASP2	-0.94477	0.958
PREB	FLII	0.90448	0.93039
PREB	GGA3	-0.00505	0.14997
PREB	MPRIP	-0.02774	0.48064
PREB	GSE1	-0.5421	0.4771
PREB	SYT11	0.49325	0.32663
PREB	PLCB1	-0.92796	0.88989
PREB	ATMIN	-0.77597	0.66243
PREB	FMOD	0.60818	0.83121
PREB	SASH1	-0.84164	0.80095
PREB	SYNE1	-0.8986	0.93752
PREB	PSD3	-0.62976	0.69038
PREB	RRP8	0.9473	0.90339
PREB	KIAA0368	-0.85674	0.78319
PREB	TMED3	0.88818	0.72734
PREB	DNPEP	0.9522	0.97508
PREB	DDAH1	-0.32488	0.41399
PREB	LEMD3	-0.71103	0.77335
PREB	SDF2L1	0.92371	0.89998
PREB	PANX1	0.68571	0.79973
PREB	FUCA2	0.75233	0.84318
PREB	UBN2	-0.33135	0.41379
PREB	GABRA6	-0.27224	0.55746
PREB	PAN3	-0.30797	0.50786
PREB	NEGR1	-0.90211	0.97963
PREB	CFAP45	0.09507	0.02419
PREB	BRI3	0.92817	0.97343
PREB	GALK1	0.86544	0.85921
PREB	ASF1A	-0.28395	0.53413
PREB	BRMS1	0.92266	0.9614
PREB	PNISR	-0.85701	0.77156
PREB	FAM169A	-0.96206	0.96327
PREB	SLITRK5	-0.92985	0.94186
PREB	SENP6	-0.77577	0.67462
PREB	FBXO22	0.87135	0.76896
PREB	FBXO10	-0.01701	0.40395
PREB	FBXO4	0.7069	0.82625
PREB	TIMM8B	0.93059	0.94305
PREB	MDGA1	-0.05388	0.64954
PREB	GGT7	-0.32582	0.63816
PREB	DIEXF	0.00691	0.04676
PREB	GLB1	0.90526	0.9417
PREB	APEX2	0.92072	0.97116
PREB	EIF3K	0.58046	0.34136
PREB	DESI1	0.47564	0.43611
PREB	GNAI2	0.73795	0.67415
PREB	ABO	-0.29178	0.35848
PREB	CCR10	0.88104	0.82647
PREB	ANKRD52	0.79055	0.8932
PREB	FGF14-AS2	-0.01001	0.14955
PREB	METRNL	0.95414	0.97385
PREB	MCHR1	0.3992	0.43574
PREB	FAM126B	-0.85286	0.86604
PREB	UNC80	-0.81769	0.91778
PREB	SCAI	-0.92825	0.9647
PREB	GRID1	-0.85931	0.91682
PREB	LAMTOR2	0.94858	0.9638
PREB	DCPS	0.89471	0.77136
PREB	SLC27A6	0.02037	0.17066
PREB	C19orf53	0.88837	0.88946
PREB	DBNL	0.96353	0.9568
PREB	HIPK2	-0.95283	0.93044
PREB	MRPL13	0.89099	0.83471
PREB	ORMDL2	0.89122	0.96001
PREB	COMMD9	0.06227	0.10147
PREB	SLC25A4	-0.74916	0.64963
PREB	TMEM208	0.95748	0.97624
PREB	CLEC2D	-0.00118	0.47103
PREB	GSS	0.95608	0.93246
PREB	GSTP1	0.88779	0.94277
PREB	SNX8	0.95181	0.96348
PREB	GMPPB	0.93289	0.95596
PREB	NRBP1	0.9789	0.98208
PREB	EFEMP2	0.87152	0.90561
PREB	HSD17B10	0.95679	0.98095
PREB	HAS3	0.46684	0.33166
PREB	HDLBP	-0.05324	0.98787
PREB	ANXA5	0.66015	0.82157
PREB	HLA-A	0.87486	0.91958
PREB	APC	-0.22713	0.81644
PREB	HTR2C	-0.72076	0.89276
PREB	ICAM1	0.77865	0.76475
PREB	IDUA	0.87494	0.82797
PREB	SLC35B2	0.84141	0.84005
PREB	VCY1B	-0.73646	0.71994
PREB	IRAK1	0.94552	0.95159
PREB	EIF6	0.97326	0.97516
PREB	TRIM23	-0.90155	0.88441
PREB	TMEM179B	0.93067	0.96212
PREB	TMEM110	0.91987	0.88073
PREB	KIF5C	-0.84182	0.61587
PREB	BOLA3	0.95646	0.94894
PREB	LAMTOR4	0.68332	0.76228
PREB	ARHGAP1	0.03485	0.56837
PREB	ARHGAP5	-0.31536	0.95936
PREB	LEPR	-0.25275	0.72225
PREB	RGS7BP	-0.8754	0.94747
PREB	GTF2H5	-0.95273	0.93935
PREB	M6PR	0.35689	0.41248
PREB	MGAT1	0.8096	0.78053
PREB	ALDH6A1	-0.9674	0.97138
PREB	MPG	0.5335	0.4065
PREB	MPV17	0.95167	0.95318
PREB	MTX1	0.84423	0.79448
PREB	MUT	-0.66415	0.82693
PREB	MYD88	0.9516	0.95911
PREB	MYH9	0.88093	0.89587
PREB	NAGLU	0.85628	0.91017
PREB	NAP1L3	-0.8989	0.94816
PREB	NDUFB7	0.52107	0.59701
PREB	NDUFS6	0.77747	0.88782
PREB	NEU1	0.95754	0.96253
PREB	NF2	-0.11668	0.08639
PREB	NFKBIE	0.83673	0.65943
PREB	NIT1	0.57004	0.31792
PREB	CNOT3	0.13328	0.14208
PREB	NTRK2	-0.93388	0.93125
PREB	RBMXL1	-0.8931	0.95001
PREB	SCAPER	-0.97455	0.98288
PREB	OXTR	0.17615	0.20078
PREB	P4HB	0.95367	0.96398
PREB	PLA2G3	-0.14009	0.68143
PREB	PCCA	-0.53242	0.68072
PREB	MRPS7	0.25984	0.15869
PREB	CRBN	-0.96277	0.95663
PREB	SHISA5	0.96183	0.95258
PREB	RNF181	0.91656	0.91344
PREB	BET1L	0.83559	0.67016
PREB	TEX264	0.907	0.9292
PREB	ATRAID	0.94975	0.9757
PREB	BIN2	0.06369	0.32636
PREB	PDE6D	-0.0294	0.38624
PREB	NOP16	0.88508	0.85403
PREB	GET4	0.9315	0.91415
PREB	SLC25A39	0.9455	0.97008
PREB	MRPS23	0.46027	0.44657
PREB	HECA	-0.68124	0.71767
PREB	DNAJB11	0.96469	0.97007
PREB	PHAX	-0.86256	0.86037
PREB	PEX10	0.05706	0.21912
PREB	PFN1	0.9667	0.96183
PREB	PHB	0.94513	0.94452
PREB	SERPINB9	-0.08536	0.11606
PREB	PIK3CB	-0.68358	0.57318
PREB	PIK3R1	-0.97117	0.97391
PREB	PIN4	-0.71079	0.82582
PREB	PKM	0.92199	0.91573
PREB	ATP6V1G2	-0.9273	0.92915
PREB	ATP6AP1	0.71966	0.71096
PREB	PMS2	0.62998	0.68257
PREB	UBL3	-0.93378	0.89575
PREB	TREM1	0.82382	0.80077
PREB	POLR2L	0.97361	0.95449
PREB	SH3TC1	0.08009	0.15869
PREB	POR	0.8727	0.82932
PREB	CHPF2	0.97012	0.95465
PREB	ADAMTSL4	0.80662	0.70489
PREB	FAM20A	0.89021	0.86588
PREB	KLHL28	-0.94174	0.93267
PREB	TMEM214	0.81611	0.74376
PREB	PQLC2	0.93856	0.88139
PREB	TMEM161A	0.79831	0.81538
PREB	COMMD4	0.80082	0.84441
PREB	COMMD8	0.26269	0.46598
PREB	PPP1CA	0.95805	0.9476
PREB	C19orf24	0.95763	0.94644
PREB	CCDC109B	0.9115	0.91903
PREB	TRMT12	0.0225	0.0614
PREB	PPP1R3C	-0.64243	0.8351
PREB	OXR1	-0.79623	0.91485
PREB	ATG2B	-0.86921	0.73295
PREB	MSTO1	0.96506	0.97524
PREB	SHQ1	0.82531	0.76602
PREB	SLC25A36	-0.76365	0.88817
PREB	EVA1B	0.95577	0.97537
PREB	FAM86C1	0.78799	0.73024
PREB	STEAP3	0.94175	0.94687
PREB	PSPC1	0.00351	0.24555
PREB	PPP2R5C	-0.90957	0.92015
PREB	RBM41	-0.72859	0.75638
PREB	BOLA2	0.94729	0.89
PREB	NOP10	0.94383	0.95873
PREB	RNPC3	-0.85379	0.72746
PREB	PPP1R9A	-0.91888	0.85683
PREB	PRKACB	-0.59038	0.93718
PREB	EDEM2	0.92675	0.91981
PREB	RCOR3	-0.40763	0.2443
PREB	TBC1D23	0.01224	0.01157
PREB	CENPJ	-0.00136	0.00377
PREB	BEX1	-0.6616	0.95267
PREB	MYDGF	0.97081	0.97215
PREB	MAP2K3	0.92668	0.84083
PREB	C8orf44	-0.80691	0.92268
PREB	UGGT1	0.95018	0.90194
PREB	NDUFA4L2	0.82871	0.79815
PREB	PNO1	0.88429	0.86253
PREB	PSMB3	0.97619	0.98033
PREB	PSMB4	0.96921	0.97341
PREB	NIT2	0.9314	0.9322
PREB	PSMB8	0.90691	0.90132
PREB	PSMB9	0.81254	0.90635
PREB	PSMD13	0.89589	0.89162
PREB	PTBP1	0.88858	0.85614
PREB	PTGER4	0.45307	0.3657
PREB	KLHL14	-0.00987	0.18816
PREB	DPP10	-0.85591	0.7826
PREB	QSOX1	0.80872	0.87477
PREB	TRIB3	0.92571	0.85518
PREB	PTPRK	-0.71608	0.57262
PREB	PVR	0.66253	0.61389
PREB	PRODH2	-0.0366	0.16836
PREB	RBM25	-0.29118	0.58822
PREB	RAD23A	0.53751	0.46735
PREB	FAM3A	0.46015	0.49974
PREB	SAV1	-0.19181	0.66133
PREB	AASDHPPT	-0.81931	0.78891
PREB	RNH1	0.82016	0.8888
PREB	RIC8A	0.85913	0.86262
PREB	ATG101	0.69047	0.47177
PREB	MRPL12	0.90032	0.88651
PREB	RPN1	0.88488	0.92416
PREB	SCN9A	0.00872	0.36017
PREB	SDC1	0.95578	0.94971
PREB	MRPL17	0.97366	0.96402
PREB	SLC39A8	0.83598	0.81466
PREB	DPEP2	0.00815	0.00761
PREB	TOR3A	0.93948	0.93325
PREB	TTC31	0.26078	0.60733
PREB	FAM231D	-0.17877	0.67519
PREB	SH3BP2	0.46231	0.49762
PREB	SHC1	0.95207	0.95985
PREB	C16orf58	0.70446	0.83192
PREB	PARP12	0.46403	0.65653
PREB	AEN	0.83776	0.73508
PREB	MRPS11	0.8351	0.79551
PREB	MRPL36	0.87924	0.86031
PREB	MRPL34	0.44959	0.66209
PREB	SMARCC1	-0.00102	0.00761
PREB	CHID1	0.94525	0.98215
PREB	SMPD1	0.57392	0.66172
PREB	BPGM	0.10611	0.13105
PREB	SSBP1	0.85708	0.86438
PREB	STX4	0.69553	0.83896
PREB	TMBIM6	0.64864	0.68173
PREB	TSPAN4	0.94821	0.95811
PREB	TNFRSF1A	0.94253	0.92455
PREB	C1R	0.90908	0.94928
PREB	TP53BP1	-0.00115	0.19697
PREB	C1S	0.77171	0.76551
PREB	TPM3	-0.85333	0.60732
PREB	TSTA3	0.85045	0.71969
PREB	TYR	-0.76315	0.76346
PREB	MEF2BNB	0.81497	0.92927
PREB	C16orf52	-0.93102	0.97107
PREB	UBA1	0.92974	0.80704
PREB	SLC35A2	0.96158	0.97973
PREB	UPP1	0.69077	0.80498
PREB	XRCC2	-0.13905	0.10615
PREB	ZYX	0.93158	0.94485
PREB	MOGS	0.96055	0.96341
PREB	IFRD2	0.939	0.96859
PREB	MANF	0.97097	0.94388
PREB	CAD	0.88959	0.83984
PREB	VKORC1	0.97227	0.95676
PREB	TMEM106C	0.91781	0.90314
PREB	ERI3	0.14918	0.14208
PREB	KXD1	0.82753	0.94153
PREB	ALG8	0.92062	0.92249
PREB	DCTPP1	0.78598	0.61256
PREB	WDR77	0.90919	0.90179
PREB	ABHD16A	0.84379	0.73079
PREB	SLC52A2	0.97705	0.9874
PREB	C1orf54	0.80018	0.89758
PREB	SAP30L	0.86906	0.88972
PREB	GAL3ST4	0.82863	0.86333
PREB	KCTD17	0.5382	0.61026
PREB	CAAP1	0.01351	0.07155
PREB	WWC2	-0.81466	0.72603
PREB	UXS1	0.66354	0.70994
PREB	SLC35F5	0.80511	0.79659
PREB	GRPEL1	0.31902	0.60356
PREB	WDR61	0.69438	0.80178
PREB	DDHD1	-0.54975	0.87065
PREB	SLC2A10	0.73607	0.79131
PREB	HDHD3	0.37395	0.35663
PREB	AIF1L	-0.01039	0.04676
PREB	TMEM47	-0.54863	0.3347
PREB	FAM57B	-0.16639	0.9222
PREB	ITCH	-0.00473	0.07634
PREB	MAD1L1	0.81187	0.7115
PREB	TMEM120A	0.86152	0.82211
PREB	TM2D2	0.89658	0.86331
PREB	STK40	0.92142	0.90134
PREB	EIF2A	-0.06027	0.23005
PREB	ITFG3	0.8246	0.78515
PREB	SRPX	0.34138	0.11139
PREB	TAGLN2	0.92571	0.91527
PREB	TMEM164	0.15972	0.11606
PREB	TMEM117	-0.0007	0.13651
PREB	TMEM126A	0.29101	0.20808
PREB	NUDT22	0.86689	0.86264
PREB	NAA38	0.40287	0.37982
PREB	CUL3	-0.82557	0.39247
PREB	CAPS2	-0.35769	0.34443
PREB	PCGF1	0.6288	0.62852
PREB	MPV17L2	0.61166	0.57426
PREB	RAE1	0.83635	0.83261
PREB	PRSS12	-0.30641	0.45229
PREB	LTV1	0.049	0.20176
PREB	MFSD5	0.92795	0.85179
PREB	DISP1	0.11432	0.55395
PREB	PPP1R16A	0.76017	0.71457
PREB	SYDE1	0.96912	0.97597
PREB	DNAJC14	0.40562	0.47579
PREB	ASMTL	-0.00193	0.17258
PREB	UNC5C	-0.01254	0.15105
PREB	HYAL2	0.81327	0.93599
PREB	B4GALT3	0.93644	0.87071
PREB	GPAA1	0.65815	0.54033
PREB	HDAC3	0.82175	0.84053
PREB	CDK5R1	-0.80658	0.89054
PREB	SQSTM1	0.87963	0.92368
PREB	SKAP2	0.14344	0.40708
PREB	SPAG9	-0.90345	0.90262
PREB	DNAJA3	0.09716	0.14208
PREB	ADCK2	0.35168	0.53561
PREB	AIFM1	0.88809	0.8522
PREB	SESTD1	-0.96635	0.95694
PREB	NEMF	-0.95227	0.92286
PREB	DGKI	-0.89498	0.83578
PREB	LRRFIP1	0.80313	0.87277
PREB	IL32	0.76574	0.83398
PREB	G6PC3	0.92903	0.94354
PREB	TRIP4	0.46972	0.50764
PREB	GTF3C4	-0.10051	0.39518
PREB	NDST3	-0.40621	0.68979
PREB	AKAP6	-0.96919	0.98379
PREB	GOSR2	0.89786	0.88109
PREB	CD63	0.94854	0.95951
PREB	UTP14C	-0.62227	0.64604
PREB	SECISBP2L	-0.90505	0.94295
PREB	LZTS3	-0.57673	0.77162
PREB	CD151	0.96931	0.98647
PREB	ATG13	-0.20906	0.1676
PREB	RB1CC1	-0.95084	0.96164
PREB	TELO2	0.54329	0.46664
ZNF263	COL4A3BP	-0.03681	0.66984
ZNF263	SCGN	0.17359	0.53696
ZNF263	FAM189B	0.10862	0.19697
ZNF263	RNPS1	0.4892	0.74832
ZNF263	SRSF8	-0.01356	0.56117
ZNF263	SNRNP27	0.06178	0.28005
ZNF263	B4GAT1	0.19039	0.11139
ZNF263	ADAMTS5	0.02736	0.05185
ZNF263	RNF24	0.63023	0.69058
ZNF263	UHRF2	0.01367	0.03325
ZNF263	CATSPER1	0.02447	0.16093
ZNF263	C10orf90	-0.64206	0.73208
ZNF263	CPXM2	-0.00465	0.09642
ZNF263	CLK2	0.65286	0.59836
ZNF263	FGD4	-0.86261	0.7885
ZNF263	FOPNL	0.82643	0.84124
ZNF263	IQCK	-0.09743	0.57001
ZNF263	PAQR4	-0.01016	0.07634
ZNF263	EARS2	0.92973	0.85127
ZNF263	FAM210A	0.5985	0.69029
ZNF263	CNP	-0.77814	0.72345
ZNF263	LRRC39	-0.02652	0.11606
ZNF263	EVC2	0.41663	0.61806
ZNF263	FAM173B	-0.0033	0.18017
ZNF263	CMBL	-0.00063	0.03759
ZNF263	TMEM99	0.70706	0.34136
ZNF263	DACT3	-0.44644	0.631
ZNF263	BROX	0.05876	0.10147
ZNF263	CCDC117	0.05002	0.0816
ZNF263	TMEM161B	0.48721	0.31792
ZNF263	CYP2J2	-0.38805	0.31389
ZNF263	DAG1	0.31688	0.3657
ZNF263	ADGRA3	0.03508	0.09182
ZNF263	LIX1	-0.22481	0.31959
ZNF263	DHPS	0.78544	0.72847
ZNF263	DNMT1	0.76763	0.61152
ZNF263	EIF4EBP1	0.80828	0.80959
ZNF263	KCTD6	-0.00116	0.24914
ZNF263	EPB41L2	-0.11094	0.49196
ZNF263	ERBB2	0.07561	0.23544
ZNF263	ALAD	-0.86779	0.5637
ZNF263	NT5DC1	-0.84865	0.69342
ZNF263	KIF6	-0.01845	0.82926
ZNF263	FH	0.31151	0.15869
ZNF263	SLITRK3	-0.00056	0.43955
ZNF263	TRAPPC8	-0.57088	0.32912
ZNF263	BAHD1	0.60304	0.31792
ZNF263	PDXDC1	0.08683	0.09182
ZNF263	TNRC6B	-0.36646	0.37384
ZNF263	ANKLE2	0.63947	0.52344
ZNF263	FAM175B	-0.00189	0.02863
ZNF263	JMJD6	-0.00119	0.58419
ZNF263	NUP210	0.35198	0.15869
ZNF263	SCFD1	-0.00054	0.02419
ZNF263	FAM208A	-0.00051	0.5468
ZNF263	KIF13B	-0.13755	0.13568
ZNF263	UFL1	-0.0554	0.1676
ZNF263	NTSR2	-0.3474	0.57468
ZNF263	PANX1	0.26134	0.15869
ZNF263	ALPL	-0.00098	0.02419
ZNF263	RNF169	0.31262	0.17762
ZNF263	SLC24A2	-0.31539	0.28389
ZNF263	RASGRP3	-0.64939	0.50949
ZNF263	GALK2	0.00878	0.02419
ZNF263	FAM127B	0.40335	0.52632
ZNF263	WIPI2	-0.00072	0.02863
ZNF263	IRF2BP1	-0.00437	0.08639
ZNF263	RSL1D1	0.15786	0.14208
ZNF263	GART	0.88641	0.79912
ZNF263	FBXL3	-0.32956	0.56544
ZNF263	TBL2	0.63169	0.64321
ZNF263	GFPT1	0.43016	0.40905
ZNF263	KLHL20	0.06157	0.07155
ZNF263	RBMS3	-0.40919	0.46289
ZNF263	GLDC	0.15231	0.33078
ZNF263	GNRH1	0.18607	0.28577
ZNF263	GOLGA3	0.34002	0.48958
ZNF263	C16orf91	0.97808	0.93072
ZNF263	MRPS18B	0.17042	0.15869
ZNF263	NXT1	0.84106	0.89353
ZNF263	SLC25A5	0.80742	0.51094
ZNF263	HOOK2	0.75529	0.6333
ZNF263	DONSON	0.8862	0.66822
ZNF263	PACSIN1	-0.40377	0.47065
ZNF263	HIST1H2AE	0.57604	0.74606
ZNF263	HIST1H2BD	0.16581	0.38719
ZNF263	KCNIP1	0.01002	0.03325
ZNF263	CTAG2	0.01974	0.12139
ZNF263	ANXA7	-0.89134	0.80777
ZNF263	HPCA	-0.06256	0.2467
ZNF263	APLP2	0.0209	0.28428
ZNF263	APOC1	-0.03568	0.10615
ZNF263	IFIT2	-0.42682	0.5665
ZNF263	IFIT1	-0.09761	0.40343
ZNF263	ANKRD37	0.32561	0.10147
ZNF263	LDHA	0.14786	0.56282
ZNF263	LDHC	0.52232	0.61597
ZNF263	FADS3	-0.00141	0.0662
ZNF263	MAGEB4	0.01799	0.0816
ZNF263	MAP4	-0.24814	0.1635
ZNF263	MDH2	0.82891	0.72993
ZNF263	MAP3K10	-0.00294	0.00377
ZNF263	MUSK	0.00254	0.03759
ZNF263	MX2	-0.00115	0.32204
ZNF263	MYO6	-0.48108	0.71394
ZNF263	ATIC	0.14148	0.53837
ZNF263	NRD1	0.08621	0.77487
ZNF263	NUP98	0.75619	0.3657
ZNF263	GLOD4	0.80353	0.76653
ZNF263	TMX2	0.3397	0.47222
ZNF263	HSD17B11	-0.27357	0.43323
ZNF263	BFAR	0.93459	0.91194
ZNF263	GET4	0.79931	0.72157
ZNF263	FKBP7	0.77976	0.65331
ZNF263	DNAJB11	0.81634	0.78152
ZNF263	TMEM8B	0.12211	0.58536
ZNF263	STK26	-0.01498	0.14235
ZNF263	PFKFB4	0.79355	0.75667
ZNF263	PHB	0.81054	0.6511
ZNF263	PLOD2	0.08649	0.29778
ZNF263	PLS1	0.15759	0.38224
ZNF263	P2RY13	-0.83464	0.66975
ZNF263	POLR2C	0.5658	0.80306
ZNF263	SSH1	-0.09329	0.0662
ZNF263	SGTB	-0.51596	0.68133
ZNF263	MAP10	0.02487	0.04233
ZNF263	RSBN1	-0.00281	0.14488
ZNF263	KLHDC4	0.00442	0.00377
ZNF263	KCTD9	0.02246	0.26782
ZNF263	ELP6	0.1987	0.21635
ZNF263	MTMR10	-0.92287	0.90931
ZNF263	TRMT10C	0.21375	0.18973
ZNF263	LPCAT2	-0.62565	0.35337
ZNF263	BANP	0.2011	0.25972
ZNF263	MRPL20	-0.00265	0.04676
ZNF263	LARP1B	0.16103	0.15869
ZNF263	RCBTB1	-0.62666	0.76298
ZNF263	ELP2	0.64857	0.2539
ZNF263	DDX19A	0.85724	0.8313
ZNF263	SYNJ2BP	-0.01579	0.32368
ZNF263	TCP11L1	0.14638	0.07155
ZNF263	YOD1	0.09209	0.19737
ZNF263	CSGALNACT2	-0.00665	0.05633
ZNF263	PKIB	0.07191	0.36327
ZNF263	LMBRD1	-0.38619	0.2443
ZNF263	PCID2	0.29372	0.63617
ZNF263	HDAC8	0.05134	0.09182
ZNF263	LANCL2	0.02263	0.09182
ZNF263	SMG9	0.28107	0.47809
ZNF263	PSEN1	-0.14629	0.62661
ZNF263	PSMB7	0.58694	0.45159
ZNF263	PARP6	0.55093	0.65558
ZNF263	CIAPIN1	0.81196	0.72875
ZNF263	TTYH1	-0.00292	0.36048
ZNF263	BAGE	0.01701	0.04233
ZNF263	KLHL42	0.73033	0.78388
ZNF263	PHRF1	0.52673	0.46192
ZNF263	DDX55	0.88687	0.84156
ZNF263	RAB3IL1	-0.0368	0.19804
ZNF263	RARRES1	0.00925	0.04233
ZNF263	SENP2	0.61525	0.65373
ZNF263	KLHL12	0.5082	0.53528
ZNF263	RFC4	0.90289	0.84287
ZNF263	DHX35	0.5263	0.59912
ZNF263	RPL23A	0.00261	0.02419
ZNF263	RPS15	0.03677	0.09182
ZNF263	RNF123	0.01033	0.0816
ZNF263	LHPP	-0.88825	0.86786
ZNF263	PDF	0.75538	0.43977
ZNF263	TFB2M	0.74819	0.85507
ZNF263	LMBR1	0.43647	0.43848
ZNF263	ARAP3	0.18225	0.14208
ZNF263	SGK1	-0.21695	0.34281
ZNF263	LPPR2	0.02214	0.22611
ZNF263	C16orf58	0.73701	0.49067
ZNF263	IPPK	0.88095	0.78421
ZNF263	RBM15	0.73591	0.61136
ZNF263	P2RY12	-0.44681	0.78818
ZNF263	ST3GAL2	0.24844	0.43154
ZNF263	MRPS6	0.17042	0.27472
ZNF263	WNK1	-0.06433	0.70366
ZNF263	SLC6A8	0.11652	0.7564
ZNF263	SLCO1A2	-0.80125	0.7403
ZNF263	CAPRIN2	0.00407	0.15274
ZNF263	SORL1	-0.56943	0.34566
ZNF263	SPINK1	0.10212	0.21105
ZNF263	TCP1	-0.01932	0.29634
ZNF263	TDGF1	0.06218	0.07155
ZNF263	TP53BP1	0.1136	0.11139
ZNF263	TUBA4A	-0.23892	0.61506
ZNF263	MAGED4	0.44499	0.31792
ZNF263	SLC35A2	0.81274	0.69629
ZNF263	VBP1	0.28772	0.21635
ZNF263	LDLRAD4	-0.69462	0.7544
ZNF263	CA9	0.63517	0.64029
ZNF263	EVI5	-0.42483	0.47652
ZNF263	USP7	-0.00086	0.70513
ZNF263	ERI3	0.00384	0.00377
ZNF263	NELFE	0.62811	0.3657
ZNF263	YRDC	0.79322	0.82042
ZNF263	SLC35E1	0.86532	0.7198
ZNF263	PGAP1	0.63883	0.31792
ZNF263	GRPEL1	0.64884	0.48909
ZNF263	MED28	0.53808	0.42299
ZNF263	ULBP2	0.50085	0.30063
ZNF263	CUL5	0.01555	0.0614
ZNF263	SLC38A1	-0.00495	0.04676
ZNF263	FAM83D	0.51023	0.42209
ZNF263	LAS1L	0.02766	0.0614
ZNF263	AKAP17A	0.61695	0.68416
ZNF263	HIST1H2BG	0.53942	0.47374
ZNF263	RAB34	0.01038	0.78146
ZNF263	KIAA1109	-0.00557	0.71403
ZNF263	SLITRK6	0.00399	0.00761
ZNF263	MIEN1	-0.01328	0.2839
ZNF263	DCTN5	0.69212	0.41116
ZNF263	C15orf41	0.42943	0.35937
ZNF263	MAK16	0.56263	0.37596
ZNF263	DIXDC1	-0.46708	0.42096
ZNF263	PPAP2B	-0.59868	0.43046
ZNF263	TNKS	0.02125	0.39938
ZNF263	EIF3A	-0.01707	0.21946
ZNF263	TNFRSF10B	0.23559	0.19697
ZNF263	SUCLA2	-0.0529	0.57395
ZNF263	KAT2B	-0.04547	0.3987
ZNF263	SPAG9	-0.16078	0.48291
ZNF263	DNAJA3	0.91593	0.7007
ZNF263	TIGD7	0.84663	0.76063
ZNF263	RPS19BP1	-0.00649	0.0662
ZNF263	SCAF11	-0.04966	0.53037
ZNF263	NAF1	0.30078	0.64122
ZNF263	TBRG4	0.87373	0.89335
ZNF263	LONP1	0.91061	0.6449
ZNF263	CPNE6	-0.49617	0.66166
ZNF263	ITM2B	-0.62258	0.49745
ZNF263	CD37	-0.08092	0.36783
ZNF263	SPTLC2	-0.64713	0.7178
ZNF263	VPS4B	-0.00275	0.33843
ZNF263	MINPP1	0.02322	0.07155
ZNF263	IQCB1	0.2077	0.21635
ZNF263	SECISBP2L	-0.5473	0.75656
ZNF263	DOCK4	-0.87024	0.82593
ZNF263	TBKBP1	0.06008	0.14208
ZNF263	SLC35E2	-0.00094	0.01157
ZNF263	DOPEY2	-0.00056	0.04676
CEBPZ	IL18BP	-0.00048	0.85302
CEBPZ	GPC6	0.88756	0.88297
CEBPZ	ACTR1B	-0.92224	0.99205
CEBPZ	MPHOSPH10	0.98354	0.99227
CEBPZ	MPHOSPH6	0.00311	0.01569
CEBPZ	SMNDC1	0.8633	0.76613
CEBPZ	CDKN2D	-0.871	0.99201
CEBPZ	GNB2L1	0.97975	0.99324
CEBPZ	CDS1	-0.96405	0.99159
CEBPZ	PIBF1	0.93872	0.9329
CEBPZ	TBL3	0.66107	0.86026
CEBPZ	TRIM3	-0.88459	0.99099
CEBPZ	STAG2	0.98684	0.99728
CEBPZ	NCKAP1	0.16528	0.14208
CEBPZ	UTP14A	0.96491	0.95283
CEBPZ	SPIN1	-0.0007	0.88406
CEBPZ	METAP2	0.91597	0.98762
CEBPZ	SF3B2	0.96942	0.99321
CEBPZ	DSTN	-0.85054	0.93195
CEBPZ	SLC35D2	0.04314	0.76652
CEBPZ	NUDT6	0.61866	0.69905
CEBPZ	NUDT3	-0.85554	0.76403
CEBPZ	FAM107A	-0.45385	0.75268
CEBPZ	RPL35	0.94387	0.92931
CEBPZ	GLB1L3	-0.46818	0.92677
CEBPZ	PHB2	0.9152	0.96514
CEBPZ	CBX3	0.97746	0.99557
CEBPZ	EXOSC8	0.97512	0.98905
CEBPZ	MGLL	-0.94121	0.96855
CEBPZ	SYNPO	-0.00435	0.99515
CEBPZ	CHRNA3	-0.00592	0.38686
CEBPZ	SDSL	0.69641	0.96146
CEBPZ	CYGB	-0.92055	0.97652
CEBPZ	MBD6	0.8391	0.97166
CEBPZ	OSBPL8	0.11939	0.86937
CEBPZ	MRPL53	0.77675	0.98206
CEBPZ	CATSPER1	0.11959	0.23001
CEBPZ	CLPTM1	-0.77892	0.75385
CEBPZ	LRIG3	0.01303	0.18286
CEBPZ	EARS2	0.40472	0.31792
CEBPZ	CCDC43	0.27165	0.63282
CEBPZ	ERICH3	-0.94916	0.99267
CEBPZ	RNF19B	-0.51727	0.8249
CEBPZ	C1orf216	-0.9545	0.99286
CEBPZ	NUP35	0.99067	0.9967
CEBPZ	AHSA2	0.37867	0.80154
CEBPZ	FAM131A	-0.96076	0.99005
CEBPZ	H1FOO	0.29458	0.47431
CEBPZ	COX6A1	-0.96308	0.98624
CEBPZ	COX6C	-0.82727	0.92308
CEBPZ	PM20D2	0.97158	0.96676
CEBPZ	CRY1	0.94997	0.9883
CEBPZ	ALG10B	0.9786	0.99152
CEBPZ	CSN1S1	-0.00061	0.01988
CEBPZ	CTSH	-0.53672	0.78698
CEBPZ	THAP6	0.93584	0.95449
CEBPZ	ADRBK1	-0.96275	0.98623
CEBPZ	AP2A2	-0.51093	0.96527
CEBPZ	DCTN1	-0.94361	0.99098
CEBPZ	DAW1	-0.05207	0.11606
CEBPZ	DHX9	0.39889	0.9967
CEBPZ	ZNF883	0.91523	0.82179
CEBPZ	DKC1	0.98283	0.99628
CEBPZ	EEF1A2	-0.61171	0.99095
CEBPZ	SCAMP5	-0.62247	0.98998
CEBPZ	EEF1B2	0.96424	0.96541
CEBPZ	RPL22L1	0.95003	0.98667
CEBPZ	EPRS	0.39775	0.95138
CEBPZ	EPS15	-0.97512	0.98571
CEBPZ	FANCE	0.97129	0.98652
CEBPZ	RASGEF1A	-0.95574	0.99372
CEBPZ	FGD2	-0.18415	0.18681
CEBPZ	C6orf136	-0.67151	0.97807
CEBPZ	DAGLB	-0.83606	0.84646
CEBPZ	TMED4	0.66907	0.61399
CEBPZ	CNKSR2	-0.75063	0.99556
CEBPZ	DIS3	0.82311	0.83159
CEBPZ	MAPRE3	-0.95471	0.99599
CEBPZ	SNRNP200	0.9869	0.99892
CEBPZ	RBM34	0.99098	0.99757
CEBPZ	MAST3	-0.94281	0.9912
CEBPZ	MON2	-0.00117	0.74695
CEBPZ	NCOA6	0.9329	0.95679
CEBPZ	RRP1B	0.97537	0.98777
CEBPZ	NCDN	-0.98468	0.99884
CEBPZ	2017-09-06	0.00325	0.99545
CEBPZ	WDR43	0.98466	0.98794
CEBPZ	2017-09-08	-0.34215	0.94447
CEBPZ	ANKRD12	0.31338	0.29901
CEBPZ	NUP160	0.99008	0.99839
CEBPZ	SZT2	-0.00844	0.5728
CEBPZ	SYNM	-0.40086	0.77358
CEBPZ	NUDCD3	-0.78866	0.94213
CEBPZ	ATP13A2	-0.97903	0.98852
CEBPZ	NCS1	-0.91911	0.99017
CEBPZ	SLC7A8	-0.97303	0.98124
CEBPZ	SUZ12	0.98508	0.99595
CEBPZ	MAPK8IP2	-0.69194	0.99739
CEBPZ	PLD3	-0.98941	0.99598
CEBPZ	LSM5	0.95914	0.98705
CEBPZ	EPHX4	-0.68765	0.97617
CEBPZ	LCORL	0.9302	0.93454
CEBPZ	GABRD	-0.78169	0.98349
CEBPZ	TMEM59L	-0.7869	0.98411
CEBPZ	NIPBL	0.55056	0.98515
CEBPZ	RPL36	0.95658	0.97571
CEBPZ	GALNT1	0.79765	0.98402
CEBPZ	CCDC28A	-0.9779	0.99199
CEBPZ	NOL11	0.98218	0.99472
CEBPZ	AAR2	0.97348	0.98341
CEBPZ	HIGD1A	-0.85455	0.96937
CEBPZ	AUTS2	0.04078	0.04233
CEBPZ	RSL1D1	0.00445	0.95586
CEBPZ	FBXO6	-0.59745	0.60844
CEBPZ	FBXO5	0.96019	0.9839
CEBPZ	GNL3	0.97427	0.97403
CEBPZ	HS6ST3	-0.88825	0.99065
CEBPZ	RBMX	0.97205	0.99093
CEBPZ	TMEM97	0.96971	0.97475
CEBPZ	GNB1	-0.04182	0.98315
CEBPZ	PGP	-0.9161	0.98264
CEBPZ	C17orf58	0.04132	0.22792
CEBPZ	GPR22	-0.41235	0.99386
CEBPZ	UNC80	-0.00779	0.65044
CEBPZ	PRRT3	-0.96804	0.99042
CEBPZ	ANK2	-0.97164	0.99169
CEBPZ	C11orf54	0.92672	0.94799
CEBPZ	GRIN1	-0.83044	0.99353
CEBPZ	MRPL18	0.43059	0.51076
CEBPZ	CCDC59	0.96616	0.97693
CEBPZ	TIMM21	0.91046	0.89431
CEBPZ	CXCL1	-0.01816	0.04676
CEBPZ	HK1	-0.97518	0.99757
CEBPZ	HLA-DPA1	-0.00589	0.71863
CEBPZ	APAF1	0.95321	0.96128
CEBPZ	APBA1	-0.85657	0.99624
CEBPZ	HPCA	-0.88378	0.99256
CEBPZ	B4GALNT4	-0.00654	0.14419
CEBPZ	KIAA1211L	-0.95459	0.99448
CEBPZ	IFNG	0.13682	0.14208
CEBPZ	IGBP1	0.88117	0.89036
CEBPZ	NUP43	0.95187	0.98873
CEBPZ	IMPDH2	0.9895	0.99759
CEBPZ	INPP4A	-0.66987	0.99061
CEBPZ	EIF3E	0.98229	0.99142
CEBPZ	JAG2	-0.95303	0.98664
CEBPZ	KCNJ4	-0.90831	0.99498
CEBPZ	ARF3	-0.96248	0.99605
CEBPZ	KPNB1	0.6325	0.99318
CEBPZ	TRNP1	-0.8718	0.94293
CEBPZ	LYSMD1	0.02236	0.17138
CEBPZ	RBM12B	0.88384	0.97766
CEBPZ	LOC390998	0.97085	0.97477
CEBPZ	KNOP1	0.78538	0.90784
CEBPZ	TOMM5	0.81086	0.94902
CEBPZ	MCM5	0.7606	0.96414
CEBPZ	ME1	-0.90602	0.96288
CEBPZ	MSN	-0.00457	0.87384
CEBPZ	MTIF2	0.81452	0.85799
CEBPZ	NCL	0.92775	0.92234
CEBPZ	RPL10A	0.92248	0.85296
CEBPZ	NPM1	0.61489	0.93229
CEBPZ	NPY1R	-0.86434	0.98993
CEBPZ	NRD1	-0.00473	0.64559
CEBPZ	NTRK3	-0.0049	0.94569
CEBPZ	PEBP1	-0.98291	0.99447
CEBPZ	PABPC3	0.97866	0.99219
CEBPZ	GEMIN4	0.97347	0.97508
CEBPZ	STMN3	-0.09988	0.97006
CEBPZ	TPRKB	0.98204	0.98844
CEBPZ	GAL	0.00348	0.04233
CEBPZ	SAR1B	0.00246	0.70252
CEBPZ	PHF11	-0.3476	0.78764
CEBPZ	KCTD3	0.96076	0.99386
CEBPZ	FAM198B	-0.63085	0.95303
CEBPZ	ATRAID	0.50956	0.98399
CEBPZ	RWDD1	0.94584	0.98183
CEBPZ	NOL7	0.9545	0.89718
CEBPZ	SUCO	0.9797	0.9982
CEBPZ	HPCAL4	-0.76823	0.99699
CEBPZ	LCMT1	-0.36637	0.97634
CEBPZ	CWC15	0.83747	0.5769
CEBPZ	LARP7	0.90913	0.9771
CEBPZ	ESF1	0.85867	0.92129
CEBPZ	NOP58	0.97772	0.98399
CEBPZ	OTUD6B	0.94616	0.93209
CEBPZ	RBMX2	0.93617	0.94597
CEBPZ	CPSF3	0.98918	0.99664
CEBPZ	ATP5G2	0.9825	0.99163
CEBPZ	TM7SF3	0.09379	0.28805
CEBPZ	COQ3	-0.00643	0.79881
CEBPZ	SERPINB9	-0.83968	0.81998
CEBPZ	ATP6V1E1	-0.96014	0.99695
CEBPZ	PLA2G4A	0.04204	0.60617
CEBPZ	SHC3	-0.00517	0.66353
CEBPZ	NUP54	0.89884	0.95305
CEBPZ	ATP7A	0.86298	0.94743
CEBPZ	RAB4B	-0.98956	0.99448
CEBPZ	EXOSC10	0.0769	0.90617
CEBPZ	YBEY	0.71082	0.54816
CEBPZ	2017-09-05	-0.53907	0.98815
CEBPZ	NLGN3	0.10066	0.69156
CEBPZ	GAR1	0.9819	0.99581
CEBPZ	DHX29	0.92161	0.97962
CEBPZ	ASNSD1	0.98431	0.98344
CEBPZ	WDR74	0.80042	0.76809
CEBPZ	RBFOX1	-0.85043	0.99153
CEBPZ	EPDR1	-0.93941	0.93343
CEBPZ	HAUS6	0.95327	0.93477
CEBPZ	DYM	0.15922	0.12139
CEBPZ	PAQR5	-0.00168	0.28468
CEBPZ	CNTLN	0.93389	0.93012
CEBPZ	ANKHD1	0.79482	0.91489
CEBPZ	SLC35F6	0.18116	0.79808
CEBPZ	PAK1IP1	0.96974	0.9564
CEBPZ	NOL8	0.94363	0.98231
CEBPZ	TMEM33	0.26925	0.93838
CEBPZ	YY1AP1	0.95386	0.94105
CEBPZ	ASXL2	0.02893	0.8184
CEBPZ	PPP2R5D	-0.58709	0.83057
CEBPZ	PPP6R3	0.96728	0.97514
CEBPZ	KLHL26	-0.98577	0.99715
CEBPZ	BRIX1	0.96956	0.90557
CEBPZ	TMA16	0.99128	0.99251
CEBPZ	SLC39A9	0.00814	0.36697
CEBPZ	PRIM1	0.9428	0.83106
CEBPZ	CHD7	0.87308	0.81677
CEBPZ	RBM22	0.98941	0.99333
CEBPZ	MAP7D1	-0.97162	0.94483
CEBPZ	PRKAR1B	-0.77659	0.98675
CEBPZ	UGGT2	0.6582	0.49086
CEBPZ	RIOK2	0.83559	0.91253
CEBPZ	FGD6	-0.80242	0.86452
CEBPZ	CSGALNACT1	-0.39625	0.77222
CEBPZ	KDM3A	0.94304	0.98752
CEBPZ	PAG1	0.64939	0.75282
CEBPZ	PECR	0.96479	0.99069
CEBPZ	PRKCZ	-0.83288	0.99617
CEBPZ	RNF114	0.87457	0.96876
CEBPZ	MAPK7	0.89292	0.99078
CEBPZ	CTNNBL1	0.95695	0.94575
CEBPZ	PRMT8	-0.52876	0.98482
CEBPZ	PPAN	0.86367	0.79565
CEBPZ	PSD	-0.40666	0.98372
CEBPZ	SH3GLB2	-0.93481	0.99167
CEBPZ	DUS3L	0.98297	0.98833
CEBPZ	YAE1D1	0.92205	0.97152
CEBPZ	CEMIP	-0.53576	0.7407
CEBPZ	CYP20A1	0.83494	0.967
CEBPZ	RHBDD2	-0.96418	0.98455
CEBPZ	INTS2	0.9588	0.96786
CEBPZ	KCTD16	-0.27292	0.97287
CEBPZ	PTCHD2	0.10952	0.34393
CEBPZ	SYT13	-0.73035	0.99562
CEBPZ	CFAP97	0.97724	0.99637
CEBPZ	BEGAIN	-0.8913	0.99364
CEBPZ	KIAA1586	0.91877	0.95877
CEBPZ	CWC22	0.8544	0.85129
CEBPZ	PPP4R4	-0.87289	0.98871
CEBPZ	ANKRA2	0.94427	0.97209
CEBPZ	SLAMF7	-0.06199	0.37564
CEBPZ	RAP2C	0.6413	0.8142
CEBPZ	CXCL16	-0.00053	0.90299
CEBPZ	PYCR1	0.96757	0.97575
CEBPZ	PYGM	-0.91487	0.92222
CEBPZ	ZBED5	0.98386	0.97975
CEBPZ	SCAF1	-0.64725	0.79447
CEBPZ	PRODH2	0.02724	0.18795
CEBPZ	SELK	0.87023	0.94441
CEBPZ	RAD17	0.80628	0.90429
CEBPZ	ELOVL5	0.14359	0.812
CEBPZ	NAA35	0.66517	0.77647
CEBPZ	RPL6	0.98061	0.98663
CEBPZ	RPL8	0.97348	0.99281
CEBPZ	RPL10	0.97871	0.97698
CEBPZ	RPL12	0.96689	0.98814
CEBPZ	RPL13	0.01072	0.99261
CEBPZ	RPL15	0.964	0.92174
CEBPZ	RPL18A	0.98585	0.99593
CEBPZ	RPL24	0.9673	0.97631
CEBPZ	RPL29	0.98618	0.99408
CEBPZ	RPL35A	0.94508	0.96543
CEBPZ	RPL36AL	0.80112	0.69296
CEBPZ	RPL37	0.87451	0.79028
CEBPZ	RPL39	0.9186	0.99081
CEBPZ	RPLP0	0.97029	0.98995
CEBPZ	RPLP2	0.9727	0.99331
CEBPZ	MRPL12	0.64616	0.75824
CEBPZ	RPS3	0.98519	0.99213
CEBPZ	RPS7	0.9848	0.99072
CEBPZ	RPS8	0.95011	0.98665
CEBPZ	RPS15A	0.9768	0.99437
CEBPZ	RPS29	0.86801	0.75411
CEBPZ	ATXN2	-0.32513	0.51203
CEBPZ	BLM	0.08404	0.23544
CEBPZ	SEPW1	-0.98953	0.99537
CEBPZ	WBSCR17	-0.96255	0.99556
CEBPZ	POLR1E	0.98578	0.99067
CEBPZ	TXNRD3NB	0.57937	0.86388
CEBPZ	S100PBP	0.12745	0.85283
CEBPZ	MRPL32	0.25926	0.60268
CEBPZ	INTS3	0.84017	0.91889
CEBPZ	FUNDC2	0.86427	0.9441
CEBPZ	TMEM108	0.08574	0.28459
CEBPZ	SNCB	-0.84243	0.99636
CEBPZ	SNRPA	0.79003	0.84849
CEBPZ	SNRPF	0.95527	0.99606
CEBPZ	SSBP1	0.83045	0.97859
CEBPZ	SSR2	0.97834	0.99621
CEBPZ	SUOX	-0.06431	0.08639
CEBPZ	TACC1	-0.0019	0.96576
CEBPZ	TAF1	0.95667	0.96939
CEBPZ	BTF3	0.99367	0.99833
CEBPZ	TARS	0.98822	0.99624
CEBPZ	BTG1	0.83413	0.9666
CEBPZ	C1QB	-0.00218	0.83988
CEBPZ	CCT3	0.98071	0.98688
CEBPZ	TYRO3	-0.89337	0.97054
CEBPZ	U2AF1	0.98275	0.99675
CEBPZ	UBC	-0.95776	0.97663
CEBPZ	UBE2L3	-0.71533	0.8721
CEBPZ	UCHL1	-0.95142	0.99684
CEBPZ	MPPED1	-0.86022	0.98789
CEBPZ	DDA1	-0.91785	0.97357
CEBPZ	ERI3	-0.689	0.81241
CEBPZ	FASTKD3	0.89663	0.90739
CEBPZ	CHAC1	-0.47573	0.73429
CEBPZ	MBOAT7	-0.97267	0.99134
CEBPZ	GPANK1	0.94447	0.95272
CEBPZ	EFHD2	-0.96216	0.94494
CEBPZ	HAUS3	0.93831	0.98707
CEBPZ	GCC1	0.70143	0.91015
CEBPZ	CDC73	0.53108	0.79853
CEBPZ	ICE2	0.95965	0.99616
CEBPZ	SMC6	0.96253	0.92024
CEBPZ	SUV39H2	0.74255	0.52496
CEBPZ	SLC25A22	-0.8842	0.99437
CEBPZ	WDR76	0.9622	0.96778
CEBPZ	RMI1	0.93992	0.90499
CEBPZ	TRPM3	-0.84488	0.94586
CEBPZ	CALM1	-0.89725	0.98816
CEBPZ	PQLC1	-0.93914	0.98672
CEBPZ	CCDC92	-0.97915	0.99773
CEBPZ	DNAJC5	-0.91775	0.98619
CEBPZ	CALM2	-0.96826	0.99859
CEBPZ	CUL5	0.77363	0.66694
CEBPZ	MLF2	-0.87131	0.95396
CEBPZ	CALM3	-0.89751	0.99695
CEBPZ	CEP44	0.93222	0.9791
CEBPZ	CAMK2B	-0.92475	0.99204
CEBPZ	FIP1L1	0.97319	0.97004
CEBPZ	COIL	0.98119	0.99149
CEBPZ	LAS1L	0.87949	0.89455
CEBPZ	PUS3	0.99484	0.99846
CEBPZ	C19orf12	-0.01646	0.95976
CEBPZ	RIOK1	0.98121	0.98755
CEBPZ	NSRP1	0.9628	0.99354
CEBPZ	CEP78	0.94903	0.91392
CEBPZ	POLR1B	0.98883	0.99582
CEBPZ	CAMKK1	-0.93042	0.98833
CEBPZ	ACBD6	0.9375	0.95862
CEBPZ	NIFK	0.99003	0.99579
CEBPZ	GNPAT	0.5909	0.92439
CEBPZ	BRSK1	-0.94214	0.98587
CEBPZ	DOC2A	-0.83643	0.99599
CEBPZ	USP38	0.87289	0.97045
CEBPZ	SMARCA5	0.8817	0.94432
CEBPZ	CDC42BPA	0.04367	0.79234
CEBPZ	BUD13	0.98806	0.99314
CEBPZ	FAM104A	0.70898	0.87896
CEBPZ	PPM1D	0.93526	0.93747
CEBPZ	NUDCD1	0.00444	0.95397
CEBPZ	CNTNAP1	-0.98781	0.99852
CEBPZ	SHANK3	-0.76066	0.98912
CEBPZ	KNDC1	-0.92367	0.99236
CEBPZ	TANC1	0.84922	0.97853
CEBPZ	ACTL6A	0.92706	0.9887
CEBPZ	DYNLL1	-0.96765	0.97932
CEBPZ	EIF3D	0.96414	0.96591
CEBPZ	EIF3F	0.98516	0.99292
CEBPZ	JRKL	0.96418	0.95855
CEBPZ	PNPT1	0.81422	0.95353
CEBPZ	TNFRSF25	-0.87541	0.85091
CEBPZ	DPM1	0.94653	0.96572
CEBPZ	ARHGEF7	-0.71034	0.98895
CEBPZ	DDX18	0.98605	0.99543
CEBPZ	EIF2B2	0.50025	0.80961
CEBPZ	CCNC	0.37961	0.8357
CEBPZ	BSN	-0.59941	0.99132
CEBPZ	FAM127A	-0.9333	0.96094
CEBPZ	ATP6V0E1	0.02267	0.98648
CEBPZ	UBE2M	-0.8525	0.97223
CEBPZ	RPL14	0.96902	0.97764
CEBPZ	PRPF3	0.96346	0.98225
CEBPZ	ALKBH8	0.97688	0.95258
CEBPZ	DDX21	0.61611	0.3982
CEBPZ	INTS4	0.98695	0.98973
CEBPZ	DHRS3	-0.0005	0.73274
CEBPZ	MED14	0.95391	0.98465
CEBPZ	RPL23	0.9874	0.99417
CEBPZ	DDX23	0.94654	0.99495
CEBPZ	PSMF1	0.93125	0.98842
CEBPZ	CHD1L	0.64616	0.83731
CEBPZ	CD53	-0.03421	0.82483
CEBPZ	IPO13	-0.95961	0.95229
CEBPZ	TTI1	0.67469	0.59376
CEBPZ	PHF14	-0.00099	0.99621
CEBPZ	CEP57	0.98649	0.98802
CEBPZ	CLSTN3	-0.91794	0.99231
CEBPZ	PTDSS1	-0.44198	0.65399
CEBPZ	PHYHIP	-0.87781	0.99527
CEBPZ	NUPL1	0.82285	0.87032
CEBPZ	C2CD2L	-0.62411	0.98731
CEBPZ	TRANK1	-0.91779	0.92485
CEBPZ	FIG4	-0.83723	0.88203
CEBPZ	KIAA0020	0.79651	0.84245
TRIM28	CHAF1A	0.99295	0.99396
TRIM28	EDIL3	-0.97827	0.9733
TRIM28	EIF1	-0.84343	0.80524
TRIM28	DDX39A	0.99419	0.99857
TRIM28	RCAN2	-0.99155	0.99725
TRIM28	CDKN2C	0.97267	0.98606
TRIM28	MCRS1	0.74927	0.8389
TRIM28	TACC3	0.99414	0.99645
TRIM28	CHERP	0.98709	0.99504
TRIM28	RNASEH2A	0.99758	0.99933
TRIM28	CENPB	0.97468	0.97842
TRIM28	KHDRBS1	0.99414	0.99685
TRIM28	CFL2	-0.70239	0.78929
TRIM28	NES	0.98955	0.9958
TRIM28	ARPP19	-0.9892	0.99555
TRIM28	RUVBL2	0.99636	0.99871
TRIM28	SF3A3	0.9859	0.98469
TRIM28	B4GAT1	0.54244	0.99966
TRIM28	ADRM1	0.97406	0.98112
TRIM28	CPSF6	0.0993	0.99668
TRIM28	HNRNPUL1	0.99904	0.99991
TRIM28	DDX20	0.99283	0.99326
TRIM28	CHML	-0.03359	0.68246
TRIM28	RNF24	0.58554	0.56753
TRIM28	KLHL2	-0.99114	0.99771
TRIM28	U2AF2	0.45005	0.99941
TRIM28	FMNL2	-0.02289	0.93046
TRIM28	CCDC85A	-0.99035	0.99661
TRIM28	TMEM200A	-0.97364	0.98648
TRIM28	PCMTD1	-0.77202	0.89352
TRIM28	SPPL3	-0.00286	0.05633
TRIM28	SLC25A29	0.11155	0.14208
TRIM28	RAVER1	0.99153	0.9953
TRIM28	ALDH16A1	0.9667	0.973
TRIM28	IRGQ	0.8178	0.95101
TRIM28	DNAJC19	-0.87761	0.80058
TRIM28	PABPC4L	0.43848	0.71072
TRIM28	DNAJC21	-0.94927	0.9378
TRIM28	ROMO1	0.9863	0.99052
TRIM28	SREK1	0.07669	0.97144
TRIM28	TTBK2	-0.00494	0.85167
TRIM28	DNAH2	-0.00083	0.00377
TRIM28	CDCA2	0.9905	0.99328
TRIM28	KIAA2026	-0.92231	0.87805
TRIM28	SYNPO2	-0.79702	0.97851
TRIM28	DKC1	0.99647	0.99915
TRIM28	DMPK	0.96899	0.9673
TRIM28	DNMT1	0.99596	0.99809
TRIM28	DTYMK	0.99547	0.9967
TRIM28	ECH1	0.95704	0.97928
TRIM28	EEF1D	0.88638	0.98065
TRIM28	ERCC1	0.93968	0.94977
TRIM28	AKT2	0.99056	0.98543
TRIM28	FBL	0.99812	0.99937
TRIM28	EZH2	0.99698	0.9983
TRIM28	FABP7	0.40682	0.98406
TRIM28	ACSL4	-0.98942	0.99587
TRIM28	CCNY	-0.97594	0.97526
TRIM28	FAM13C	-0.97901	0.97639
TRIM28	BRAT1	0.99072	0.9906
TRIM28	LRWD1	0.97767	0.98741
TRIM28	RAB11FIP2	-0.99309	0.9961
TRIM28	ENPP4	-0.98953	0.99132
TRIM28	RALY	0.99098	0.99815
TRIM28	GANAB	0.99115	0.99614
TRIM28	TMEM194A	0.98379	0.98474
TRIM28	KIAA0930	-0.9789	0.97915
TRIM28	DOCK9	-0.98645	0.99338
TRIM28	NUP62	0.99732	0.99917
TRIM28	PRKD2	0.99002	0.99651
TRIM28	RPL36	0.98669	0.98632
TRIM28	SGMS1	-0.95631	0.96316
TRIM28	HIGD1A	-0.96403	0.96606
TRIM28	FAM169A	-0.96016	0.96444
TRIM28	PRPF31	0.99691	0.99796
TRIM28	SERBP1	0.98595	0.98298
TRIM28	PRELID1	0.94193	0.94156
TRIM28	UBE2S	0.9911	0.99474
TRIM28	INO80E	0.99212	0.99572
TRIM28	C19orf54	0.93023	0.83494
TRIM28	EMC10	0.96954	0.95541
TRIM28	TMEM14A	-0.96785	0.95403
TRIM28	MED4	-0.60193	0.58831
TRIM28	GSTP1	0.96912	0.9748
TRIM28	USP25	-0.31132	0.99222
TRIM28	UQCR10	-0.97862	0.98481
TRIM28	STRN4	0.91414	0.99054
TRIM28	H2AFX	0.9968	0.99889
TRIM28	ANXA7	-0.99194	0.99156
TRIM28	PRMT1	0.99828	0.99955
TRIM28	HSPA9	0.08634	0.11139
TRIM28	CCDC137	0.95682	0.94157
TRIM28	SPOPL	-0.95705	0.93189
TRIM28	EIF6	0.98698	0.98896
TRIM28	AGRN	0.93297	0.9368
TRIM28	KIT	-0.93659	0.93979
TRIM28	KIFC1	0.99006	0.99604
TRIM28	LIG1	0.99589	0.99798
TRIM28	MEX3D	0.97995	0.99272
TRIM28	LMNB1	0.99361	0.99708
TRIM28	STS	-0.82099	0.75955
TRIM28	MCM3	0.99648	0.99869
TRIM28	MYO9B	0.93446	0.92783
TRIM28	NDUFB5	-0.7602	0.90336
TRIM28	CNOT3	0.97975	0.98671
TRIM28	OAT	-0.99374	0.9989
TRIM28	C18orf32	-0.93189	0.90349
TRIM28	WRAP73	0.97931	0.97604
TRIM28	PAFAH1B3	0.99379	0.99345
TRIM28	TAS2R10	0.32388	0.34136
TRIM28	ACOX1	-0.01426	0.36263
TRIM28	SLC35C2	0.9843	0.99352
TRIM28	NOSIP	0.90731	0.8431
TRIM28	MRTO4	0.90286	0.86887
TRIM28	CD320	0.98701	0.98912
TRIM28	ATP5D	0.9109	0.94019
TRIM28	ATP6V1D	-0.96059	0.98697
TRIM28	PDHB	-0.49725	0.60956
TRIM28	YPEL5	-0.99057	0.99262
TRIM28	GINS2	0.99635	0.99725
TRIM28	ATP6V1C1	-0.98861	0.98881
TRIM28	PIP4K2A	-0.98473	0.98407
TRIM28	PLCG1	0.96925	0.95442
TRIM28	MBD3	0.99368	0.99644
TRIM28	PTOV1	0.97118	0.98824
TRIM28	POLD1	0.99517	0.99769
TRIM28	POLE	0.97108	0.9609
TRIM28	NDUFB11	0.6153	0.49092
TRIM28	DDX49	0.99328	0.9939
TRIM28	NDFIP2	-0.98521	0.98881
TRIM28	PPM1G	0.99251	0.99532
TRIM28	C20orf27	0.98854	0.98976
TRIM28	ENOX1	-0.92212	0.89039
TRIM28	PPP1R3C	-0.94508	0.94845
TRIM28	ATP5SL	0.89677	0.91799
TRIM28	PPP2CB	-0.96671	0.96418
TRIM28	RMDN3	-0.6713	0.834
TRIM28	FAM86C1	0.63842	0.69164
TRIM28	TMEM55A	-0.96847	0.96309
TRIM28	RBM38	0.97784	0.9874
TRIM28	RNF126	0.53175	0.6499
TRIM28	NDC1	0.97791	0.97072
TRIM28	LMBRD1	-0.97153	0.96976
TRIM28	PKN1	0.97711	0.99046
TRIM28	TMEM126B	-0.90802	0.89018
TRIM28	PRKCSH	0.96144	0.96716
TRIM28	RCC2	0.99628	0.99889
TRIM28	MAP2K2	0.94594	0.94471
TRIM28	PRRG1	-0.98465	0.97358
TRIM28	SEPN1	0.9811	0.99457
TRIM28	PTBP1	0.99585	0.99822
TRIM28	GALNT16	-0.8365	0.75391
TRIM28	PTK7	0.98425	0.98796
TRIM28	PTMS	0.98481	0.9787
TRIM28	PHF12	0.97301	0.98547
TRIM28	GRAMD1A	0.98713	0.99026
TRIM28	CACTIN	0.98092	0.95442
TRIM28	RAB1A	-0.97142	0.98251
TRIM28	RAD9A	0.96848	0.97061
TRIM28	UPF1	0.97065	0.96672
TRIM28	RFC2	0.99288	0.98725
TRIM28	RP9	0.99518	0.99834
TRIM28	RPL18	0.99267	0.9929
TRIM28	RPL28	0.99246	0.99445
TRIM28	MRPL12	0.98755	0.97857
TRIM28	RPS2	0.99511	0.99841
TRIM28	RPS5	0.9976	0.99958
TRIM28	RPS11	0.98619	0.99204
TRIM28	RPS16	0.99359	0.99674
TRIM28	RPS19	0.99449	0.99579
[truncated: 367,319+ more rows]
